# Supplementary material for: Iron-catalysed allylation–hydrogenation sequences as masked alkyl–alkyl cross-couplings
Source: Royal Society of Chemistry journal article supplement (doi:10.1039/c9ra07604b), 2019-01-01
Supplement: c9ra07604b1.pdf [file c9ra07604b1.pdf]

# Supporting Information

## Iron-Catalysed Allylation-Hydrogenation Sequences as Masked Alkyl-Alkyl Cross-Couplings

Josef Bernauer, Guojiao Wu, and Axel Jacobi von Wangelin

|   |                                                                |    |
|---|----------------------------------------------------------------|----|
| 1 | General .....                                                  | 2  |
| 2 | Preparation of Starting Materials.....                         | 4  |
|   | Preparation of Allylic Alcohols - Procedure 1.....             | 4  |
|   | Preparation of Allylic Alcohols - Procedure 2.....             | 8  |
|   | Acetylation reactions.....                                     | 10 |
|   | Alkenylation Acetylation Reactions.....                        | 16 |
|   | Synthesis of grignard reagents .....                           | 18 |
| 3 | Iron-catalysed cross-coupling reactions.....                   | 20 |
|   | Procedures .....                                               | 20 |
|   | Optimization experiments with allylacetate.....                | 22 |
|   | Optimization experiments with alkyl-substituted acetates ..... | 26 |
|   | Optimization experiments with aryl-substituted acetates.....   | 28 |
|   | Isolated products .....                                        | 29 |
| 4 | Mechanistic Investigations .....                               | 45 |
|   | External Functional Group Test / Effect of electrophiles.....  | 45 |
|   | Kinetic Poisoning .....                                        | 47 |
|   | Filtration Test.....                                           | 48 |
|   | Radical Clock Experiments.....                                 | 48 |
|   | Stoichiometric Reduction Experiments.....                      | 50 |
|   | Hydrogenation Poisoning studies .....                          | 51 |
|   | References .....                                               | 52 |

# 1 General

Chemicals and Solvents. If not indicated, commercial reagents were used without purification. For catalytic reactions, exclusively dried solvents were used. Liquid substrates were distilled prior to use. THF was dried over sodium/benzophenone and distilled. All Fe-catalyzed reactions were performed under an atmosphere of dry argon using standard Schlenk and glovebox techniques.

Analytical thin-layer chromatography. TLC was performed using aluminium plates with silica gel and fluorescent indicator (Merck, 60F<sub>254</sub>). Thin-layer chromatography plates were visualized by exposure to UV light and/or by immersion in an aqueous staining solution of KMnO<sub>4</sub>.

Column chromatography. Flash column chromatography with silica gel 60 Å (220-240 mesh) from Acros. Mixtures of pentane with ethyl acetate were used as eluents.

Gas chromatography with mass-selective detector. Agilent 6890N Network GC-System, mass detector 5975 MS. Column BPX5 (30 m x 0.25 mm x 0.25 µm) from SGE, carrier gas: H<sub>2</sub>. Standard heating procedure: 50°C (2 min), 25°C/min → 300°C (5 min).

Gas chromatography with FID. Agilent 7820A GC-Systems. Column: HP 5 19091J 413 (30 m x 0.32 mm x 0.25 µm) from Agilent, carrier gas: N<sub>2</sub>. GC-FID was used for catalyst screening (calibration with analytically pure samples vs. internal *n*-pentadecane).

NMR. <sup>1</sup>H and <sup>13</sup>C nuclear magnetic resonance spectra were recorded on a Bruker Avance 300 (300 MHz <sup>1</sup>H; 75 MHz <sup>13</sup>C) and Bruker Avance 400 (400 MHz <sup>1</sup>H, 101 MHz <sup>13</sup>C) spectrometers. Chemical shifts are reported in ppm (δ) relative to internal tetramethylsilane (TMS). Coupling constants (*J*) are reported in Hertz (Hz).

High resolution mass spectrometry (HRMS). The spectra were recorded by the Central Analytics Lab at the Department of Chemistry, University of Regensburg.

## 2 Preparation of Starting Materials

### Preparation of Allylic Alcohols - Procedure 1

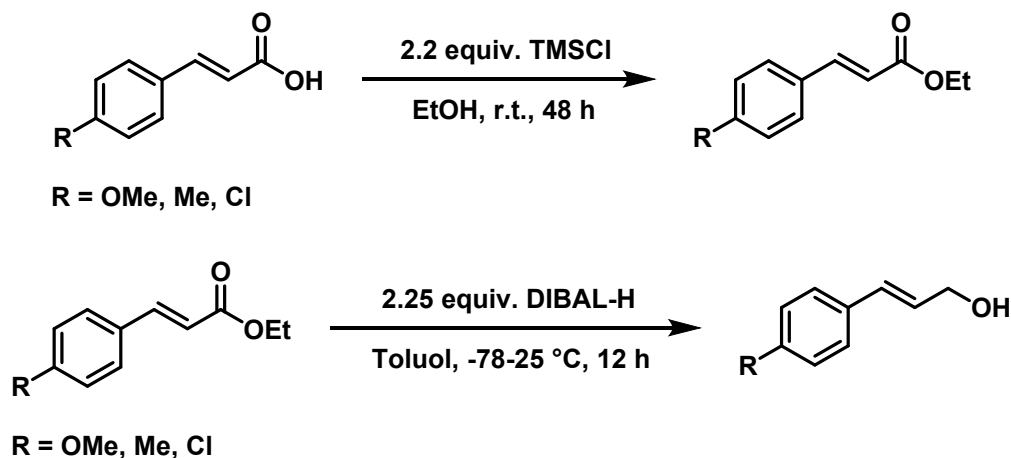

Representative procedure on the example of 4-methoxy cinnamyl alcohol:

1) Chlorotrimethylsilane (TMSCl, 33 mmol, 4.2 mL) was added to a solution of 4-methoxycinnamic acid (15 mmol, 2.67 g) in 75 ml of ethanol. The solution was stirred at room temperature for 48 hours. The solvent was then removed under reduced pressure.

2) 13.5 ml of a 1.0 M diisobutylaluminum hydride (DIBAL-H) solution in toluene was added dropwise at  $-78^\circ\text{C}$  to a solution of 4-methoxy ethyl cinnamate (6 mmol, 1.24 g) in toluene (18 mL) over 45 minutes. The reaction was stirred at room temperature for 12 hours before gently hydrolyzing with ice-cooled 1.0 M aqueous HCl solution (15 mL). The aqueous phase was extracted with  $\text{Et}_2\text{O}$  and the combined organic phases were then dried over  $\text{NaSO}_4$ . After filtering off the drying agent, the solvent was distilled off under reduced pressure. No further purification was required.<sup>1</sup>

### 4-methoxyethyl cinnamate

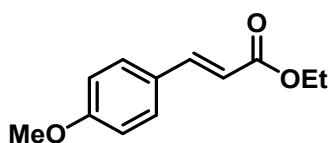

$\text{C}_{12}\text{H}_{14}\text{O}_3$  206.24 g/mol

|                           |                                                                                                                                                                                                                                                    |
|---------------------------|----------------------------------------------------------------------------------------------------------------------------------------------------------------------------------------------------------------------------------------------------|
| <b>Yield</b>              | 3.07 g, 14.9 mmol, 99%                                                                                                                                                                                                                             |
| <b><sup>1</sup>H-NMR</b>  | (300 MHz, CDCl <sub>3</sub> ) δ <sub>H</sub> [ppm] = 7.64 (d, <i>J</i> = 16.0 Hz, 1H), 7.54 - 7.43 (m, 2H), 6.96 - 6.82 (m, 2H), 6.31 (d, <i>J</i> = 16.0 Hz, 1H), 4.25 (q, <i>J</i> = 7.1 Hz, 2H), 3.84 (s, 3H), 1.33 (t, <i>J</i> = 7.1 Hz, 3H). |
| <b><sup>13</sup>C-NMR</b> | (75 MHz, CDCl <sub>3</sub> ) δ <sub>C</sub> [ppm] = 167.4, 161.3, 144.3, 129.7, 127.2, 115.7, 114.3, 60.4, 55.4, 14.4.                                                                                                                             |
| <b>GC-MS</b>              | (EI, 70 eV, <i>m/z</i> ): 206 [M] <sup>+</sup> , 194, 181, 161, 149, 136, 121, 110, 78, 69, 51.                                                                                                                                                    |

The data corresponds to the literature values.<sup>2</sup>

#### 4-methoxy cinnamyl alcohol

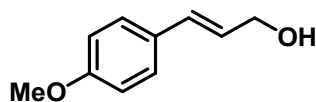

C<sub>10</sub>H<sub>12</sub>O<sub>2</sub> 164.20 g/mol

|                           |                                                                                                                                                                                                                         |
|---------------------------|-------------------------------------------------------------------------------------------------------------------------------------------------------------------------------------------------------------------------|
| <b>Yield</b>              | 879 mg, 5.4 mmol, 89%                                                                                                                                                                                                   |
| <b><sup>1</sup>H-NMR</b>  | (400 MHz, CDCl <sub>3</sub> ) δ <sub>H</sub> [ppm] = 7.36 - 7.29 (m, 2H), 6.90 - 6.81 (m, 2H), 6.56 (d, <i>J</i> = 15.9 Hz, 1H), 6.24 (dt, <i>J</i> = 15.9, 6.0 Hz, 1H), 4.30 (d, <i>J</i> = 5.6 Hz, 2H), 3.81 (s, 3H). |
| <b><sup>13</sup>C-NMR</b> | (101 MHz, CDCl <sub>3</sub> ) δ <sub>C</sub> [ppm] = 159.4, 131.0, 129.4, 127.7, 126.3, 114.0, 64.0, 55.3.                                                                                                              |
| <b>GC-MS</b>              | (EI, 70 eV, <i>m/z</i> ): 164 [M] <sup>+</sup> , 147, 136, 121, 110, 78, 50.                                                                                                                                            |

The data corresponds to the literature values.<sup>3</sup>

#### 4-chloroethyl cinnamate

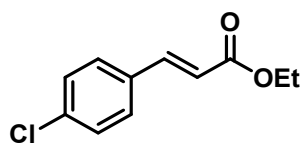

$C_{11}H_{11}ClO_2$  210.66 g/mol

|                                |                                                                                                                                                                                |
|--------------------------------|--------------------------------------------------------------------------------------------------------------------------------------------------------------------------------|
| <b>Yield</b>                   | 3.15 g, 15 mmol, 100%                                                                                                                                                          |
| <b><math>^1H</math>-NMR</b>    | (300 MHz, $CDCl_3$ ) $\delta_H$ [ppm] = 7.63 (d, $J$ = 16.0 Hz, 1H), 7.51 - 7.29 (m, 4H), 6.40 (d, $J$ = 16.0 Hz, 1H), 4.26 (q, $J$ = 7.1 Hz, 2H), 1.33 (t, $J$ = 7.1 Hz, 3H). |
| <b><math>^{13}C</math>-NMR</b> | (75 MHz, $CDCl_3$ ) $\delta_C$ [ppm] = 166.8, 143.2, 136.1, 133.0, 129.2, 129.2, 118.9, 60.7, 14.3.                                                                            |
| <b>GC-MS</b>                   | (EI, 70 eV, $m/z$ ): 210 $[M]^+$ , 182, 165, 138, 102, 75, 63, 50.<br>The data corresponds to the literature values. <sup>2</sup>                                              |

#### 4-chloro cinnamyl alcohol

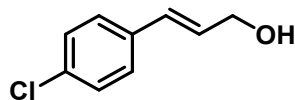

$C_9H_9ClO$  168.62 g/mol

|                                |                                                                                                                                                              |
|--------------------------------|--------------------------------------------------------------------------------------------------------------------------------------------------------------|
| <b>Yield</b>                   | 877 mg, 5.2 mmol, 87%                                                                                                                                        |
| <b><math>^1H</math>-NMR</b>    | (400 MHz, $CDCl_3$ ) $\delta_H$ [ppm] = 7.39-7.26 (m, 4H), 6.58 (d, $J$ = 15.9 Hz, 1H), 6.34 (dt, $J$ = 15.9, 5.6 Hz, 1H), 4.33 (dd, $J$ = 5.6, 1.5 Hz, 2H). |
| <b><math>^{13}C</math>-NMR</b> | (101 MHz, $CDCl_3$ ) $\delta_C$ [ppm] = 135.2, 133.3, 129.8, 129.2, 128.8, 127.7, 63.6.                                                                      |
| <b>GC-MS</b>                   | (EI, 70 eV, $m/z$ ): 168 $[M]^+$ , 151, 122, 115, 91, 61.<br>The data corresponds to the literature values. <sup>3</sup>                                     |

#### 4-methyl ethyl cinnamate

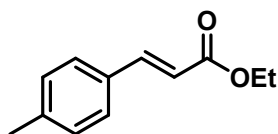

$C_{12}H_{14}O_2$  190.24 g/mol

|                                |                                                                                                                                                                                                                                 |
|--------------------------------|---------------------------------------------------------------------------------------------------------------------------------------------------------------------------------------------------------------------------------|
| <b>Yield</b>                   | 2.86 g, 15 mmol, 100%                                                                                                                                                                                                           |
| <b><math>^1H</math>-NMR</b>    | (300 MHz, $CDCl_3$ ) $\delta_H$ [ppm] = 7.66 (d, $J$ = 16.0 Hz, 1H), 7.42 (d, $J$ = 8.2 Hz, 2H), 7.19 (d, $J$ = 8.0 Hz, 2H), 6.39 (d, $J$ = 16.0 Hz, 1H), 4.26 (q, $J$ = 7.1 Hz, 2H), 2.37 (s, 3H), 1.34 (t, $J$ = 7.1 Hz, 3H). |
| <b><math>^{13}C</math>-NMR</b> | (75 MHz, $CDCl_3$ ) $\delta_C$ [ppm] = 167.3, 144.6, 140.7, 131.7, 129.6, 128.1, 117.2, 60.4, 21.5, 14.4.                                                                                                                       |
| <b>GC-MS</b>                   | (EI, 70 eV, m/z): 190 [M] <sup>+</sup> , 172, 162, 145, 132, 115, 103, 91, 76, 63, 51.                                                                                                                                          |

The data corresponds to the literature values.<sup>2</sup>

#### 4-methyl cinnamyl alcohol

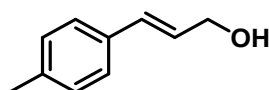

$C_{10}H_{12}O$  148.21 g/mol

|                                |                                                                                                                                                                                                                               |
|--------------------------------|-------------------------------------------------------------------------------------------------------------------------------------------------------------------------------------------------------------------------------|
| <b>Yield</b>                   | 629 mg, 4.2 mmol, 71%                                                                                                                                                                                                         |
| <b><math>^1H</math>-NMR</b>    | (400 MHz, $CDCl_3$ ) $\delta_H$ [ppm] = 7.29 (d, $J$ = 8.1 Hz, 2H), 7.13 (d, $J$ = 7.9 Hz, 2H), 6.59 (d, $J$ = 15.9 Hz, 1H), 6.32 (dt, $J$ = 15.9, 5.9 Hz, 1H), 4.31 (dd, $J$ = 5.8, 1.3 Hz, 2H), 2.34 (s, $J$ = 8.0 Hz, 3H). |
| <b><math>^{13}C</math>-NMR</b> | (101 MHz, $CDCl_3$ ) $\delta_C$ [ppm] = 137.6, 133.9, 131.3, 129.3, 127.4, 126.4, 63.9, 21.2.                                                                                                                                 |
| <b>GC-MS</b>                   | (EI, 70 eV, m/z): 148 [M] <sup>+</sup> , 131, 105, 71, 55.                                                                                                                                                                    |

The data corresponds to the literature values.<sup>3</sup>

### Preparation of Allylic Alcohols - Procedure 2

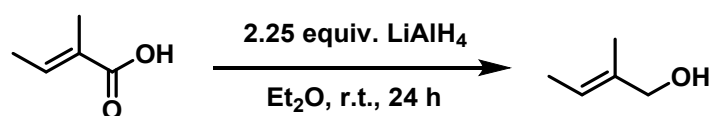

Under inert gas atmosphere (N<sub>2</sub>), lithiumaluminum hydride (34 mmol, 1.29 g) was charged in 40 mL of absolute Et<sub>2</sub>O. Tiglic acid (15 mmol, 1.5 g) was dissolved in 20 mL of absolute Et<sub>2</sub>O and added dropwise over a period of 2 hours with the aid of a dropping funnel. The suspension was stirred for 24 hours at room temperature and then carefully hydrolyzed with ice water and 15% aqueous NaOH solution (2 mL each). After addition of another 25 mL of ice water, the reaction mixture was filtered and the aqueous phase was extracted with Et<sub>2</sub>O. The collected organic phases were dried over NaSO<sub>4</sub>. The drying agent was filtered off and the solvent was carefully removed at 50 °C at ambient pressure. The product was purified by distillation at 60 °C at 20 mbar.<sup>4</sup>

#### (E)-2-methylbut-2-en-1-ol

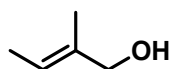

C<sub>5</sub>H<sub>10</sub>O 86.13 g/mol

|                           |                                                                                                                                                                                          |
|---------------------------|------------------------------------------------------------------------------------------------------------------------------------------------------------------------------------------|
| <b>Yield</b>              | 586 mg, 6.8 mmol, 45%                                                                                                                                                                    |
| <b><sup>1</sup>H-NMR</b>  | (300 MHz, CDCl <sub>3</sub> ) δ <sub>H</sub> [ppm] = 5.58 - 5.39 (m, 1H), 3.98 (d, <i>J</i> = 5.9 Hz, 2H), 1.65 (d, <i>J</i> = 1.0 Hz, 3H), 1.61 (ddd, <i>J</i> = 6.7, 2.1, 1.0 Hz, 4H). |
| <b><sup>13</sup>C-NMR</b> | (101 MHz, CDCl <sub>3</sub> ) δ <sub>C</sub> [ppm] = 135.5, 120.7, 69.1, 13.4, 13.1.                                                                                                     |
| <b>GC-HRMS</b>            | (CI, <i>m/z</i> ): found 86.07269 [M] <sup>+</sup> (calculated 86.07262).                                                                                                                |

The data corresponds to the literature values.<sup>4</sup>

## Acetylation reactions

### Procedure A

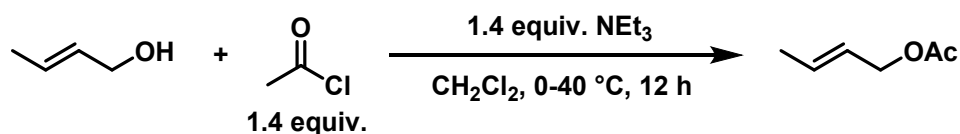

Representative procedure on the example of Crotylacetate: Crotyl alcohol (50 mmol, 3.6 g) and triethylamine (70 mmol, 9.0 mL) were dissolved in dichloromethane (25 mL) in a dry three-necked flask. The solution was cooled to 0 °C and acetyl chloride (70 mmol, 4.6 mL) in 25 mL dichloromethane was slowly added dropwise via a dropping funnel. The mixture was subsequently heated under reflux for 12 hours and, after cooling to room temperature, the precipitate formed was filtered off. The yellow solution was washed with saturated NaHCO<sub>3</sub> solution and with distilled water. The organic phase was dried over NaSO<sub>4</sub>. After filtering off the drying agent, the solvent was carefully distilled off under reduced pressure (500 mbar). Product purification was carried out by distillation at 80 °C under a pressure of 20 mbar.<sup>5</sup>

### Procedure B

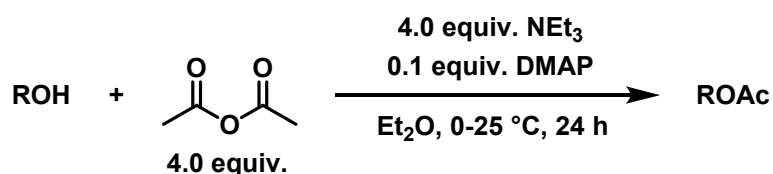

Representative procedure on the example of 4-methoxycinnamylacetate: 4-methoxycinnamyl alcohol (4 mmol, 657 mg), triethylamine (16 mmol, 2.2 ml) and 4-(dimethylamino)-pyridine (DMAP) (0.4 mmol, 49 mg) were dissolved in absolute Et<sub>2</sub>O (20 mL). The solution was cooled to 0 °C. and acetic anhydride (16 mmol, 1.5 mL) was added dropwise. The mixture was stirred at room temperature for 24 hours. The reaction solution was then washed with saturated NaHCO<sub>3</sub> solution, 10% aqueous NaOH solution and saturated NaCl solution, and the organic phase was dried over NaSO<sub>4</sub>. After filtering off the drying agent, the solvent was distilled off under reduced pressure. The crude product was purified by flash chromatography when necessary.<sup>6</sup>



## Crotyl acetate

Synthesized according to procedure A.

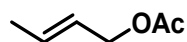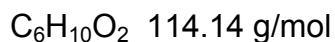

**Yield** 1.92 g, 16.8 mmol, 34%

**$^1H$ -NMR** (300 MHz,  $CDCl_3$ )  $\delta_H$  [ppm] = 5.80 (dq,  $J$  = 12.8, 6.4 Hz, 1H), 5.59 (dtd,  $J$  = 8.1, 6.5, 1.5 Hz, 1H), 4.49 (d,  $J$  = 6.5 Hz, 2H), 2.06 (s, 3H), 1.72 (dd,  $J$  = 6.4, 1.0 Hz, 3H).

**$^{13}C$ -NMR** (101 MHz,  $CDCl_3$ )  $\delta_C$  [ppm] = 170.9, 131.5, 125.1, 65.2, 21.0, 17.8.

**GC-HRMS** (CI, m/z): found 114.0667  $[M]^+$  (calculated 114.0681).

The data corresponds to the literature values.<sup>7</sup>

## (E)-non-2-en-1-yl acetate

Synthesized according to procedure A.

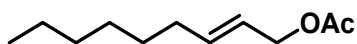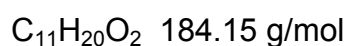

**$^1H$ -NMR** (300 MHz, Chloroform-d)  $\delta$  5.77 (dtt,  $J$  = 15.5, 6.6, 1.1 Hz, 1H), 5.55 (dtt,  $J$  = 15.5, 6.5, 1.4 Hz, 1H), 4.50 (dt,  $J$  = 6.5, 1.1 Hz, 2H), 2.06 (d,  $J$  = 1.8 Hz, 5H), 1.49 – 1.17 (m, 8H), 0.96 – 0.78 (m, 3H).

**$^{13}C$ -NMR** (75 MHz,  $CDCl_3$ )  $\delta$  170.94, 136.82, 123.62, 65.39, 32.28, 31.68, 28.85, 22.61, 21.09, 14.10.

**GC-HRMS** (EI, 70 eV m/z): found 184.14653  $[M]^+$  (calculated 184.14578).

#### 4-methoxycinnamyl acetate

Synthesized according to procedure B.

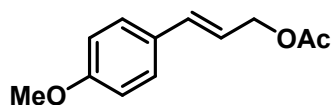

$C_{12}H_{14}O_3$  206.24 g/mol

|                                |                                                                                                                                                                                                                 |
|--------------------------------|-----------------------------------------------------------------------------------------------------------------------------------------------------------------------------------------------------------------|
| <b>Yield</b>                   | 644 mg, 3.1 mmol, 78%                                                                                                                                                                                           |
| <b><math>^1H</math>-NMR</b>    | (400 MHz, $CDCl_3$ ) $\delta_H$ [ppm] = 7.39 - 7.30 (m, 2H), 6.92 - 6.79 (m, 2H), 6.60 (d, $J$ = 15.9 Hz, 1H), 6.15 (dt, $J$ = 15.8, 6.6 Hz, 1H), 4.70 (dd, $J$ = 6.6, 1.1 Hz, 2H), 3.81 (s, 3H), 2.09 (s, 3H). |
| <b><math>^{13}C</math>-NMR</b> | (101 MHz, $CDCl_3$ ) $\delta_C$ [ppm] = 170.9, 159.6, 134.1, 129.0, 127.9, 120.9, 114.0, 65.4, 55.3, 21.1.                                                                                                      |
| <b>GC-MS</b>                   | (EI, 70 eV, m/z): 206 $[M]^+$ , 163, 147, 135, 115, 103, 91, 78, 63, 51.<br>The data corresponds to the literature values. <sup>8</sup>                                                                         |

#### 4-chlorocinnamyl acetate

Synthesized according to procedure B.

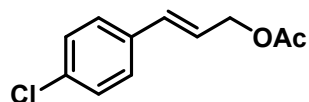

$C_{11}H_{11}ClO_2$  210.66 g/mol

|                                |                                                                                                                                                                              |
|--------------------------------|------------------------------------------------------------------------------------------------------------------------------------------------------------------------------|
| <b>Yield</b>                   | 608 mg, 2.9 mmol, 73%                                                                                                                                                        |
| <b><math>^1H</math>-NMR</b>    | (400 MHz, $CDCl_3$ ) $\delta_H$ [ppm] = 7.34 - 7.27 (m, 4H), 6.60 (d, $J$ = 15.9 Hz, 1H), 6.26 (dt, $J$ = 15.9, 6.4 Hz, 1H), 4.72 (dd, $J$ = 6.4, 1.2 Hz, 2H), 2.10 (s, 3H). |
| <b><math>^{13}C</math>-NMR</b> | (101 MHz, $CDCl_3$ ) $\delta_C$ [ppm] = 170.8, 134.7, 133.8, 132.9, 128.8, 127.8, 123.9, 64.9, 21.0.                                                                         |

**GC-MS** (EI, 70 eV, m/z): 210 [M]<sup>+</sup>, 168, 151, 133, 115, 103, 89, 77, 63, 51.  
The data corresponds to the literature values.<sup>8</sup>

#### 4-methylcinnamyl acetate

Synthesized according to procedure B.

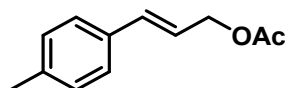

C<sub>12</sub>H<sub>14</sub>O<sub>2</sub> 190.24 g/mol

**Yield** 613 mg, 3.2 mmol, 81%

**<sup>1</sup>H-NMR** (400 MHz, CDCl<sub>3</sub>) δ<sub>H</sub> [ppm] = 7.29 (d, *J* = 8.1 Hz, 2H), 7.13 (d, *J* = 7.9 Hz, 2H), 6.62 (d, *J* = 15.9 Hz, 1H), 6.24 (dt, *J* = 15.8, 6.5 Hz, 1H), 4.72 (dd, *J* = 6.5, 1.1 Hz, 2H), 2.34 (s, 3H), 2.10 (s, 3H).

**<sup>13</sup>C-NMR** (101 MHz, CDCl<sub>3</sub>) δ<sub>C</sub> [ppm] = 170.9, 138.0, 134.3, 133.4, 129.3, 126.6, 122.1, 65.3, 21.2, 21.0.

**GC-MS** (EI, 70 eV, m/z): 190 [M]<sup>+</sup>, 148, 131, 115, 103, 91, 77, 65, 51.  
The data corresponds to the literature values.<sup>8</sup>

#### 2-methylbut-3-en-2-yl acetate

Synthesized according to procedure B.

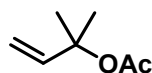

C<sub>7</sub>H<sub>12</sub>O<sub>2</sub> 128.17 g/mol

**Yield** 548 mg, 4.3 mmol, 22%

**<sup>1</sup>H-NMR** (400 MHz, CDCl<sub>3</sub>) δ<sub>H</sub> [ppm] = 6.07 (dd, *J* = 17.5, 10.9 Hz, 1H), 5.16 (d, *J* = 17.5 Hz, 1H), 5.06 (dd, *J* = 10.9, 0.5 Hz, 1H), 1.98 (s, 3H), 1.51 (s, 6H).

**<sup>13</sup>C-NMR** (101 MHz, CDCl<sub>3</sub>) δ<sub>C</sub> [ppm] = 170.1, 142.6, 112.6, 80.6, 29.4, 26.5, 22.3.

**GC-HRMS** (CI, *m/z*): found 128.0795 [M]<sup>+</sup> (calculated 128.0788).

The data corresponds to the literature values.<sup>6</sup>

### **(*E*)-2-methylbut-2-en-1-ylacetate**

Synthesized according to procedure B.

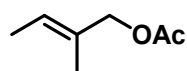

C<sub>7</sub>H<sub>12</sub>O<sub>2</sub> 128.17 g/mol

**Yield** 344 mg, 2.7 mmol, 67%

**<sup>1</sup>H-NMR** (400 MHz, CDCl<sub>3</sub>) δ<sub>H</sub> [ppm] = 5.64 - 5.45 (m, 1H), 4.45 (s, 2H), 2.07 (s, 3H), 1.73 - 1.55 (m, 6H).

**<sup>13</sup>C-NMR** (101 MHz, CDCl<sub>3</sub>) δ<sub>C</sub> [ppm] = 171.1, 130.8, 124.2, 70.4, 21.0, 13.6, 13.3.

**GC-HRMS** R<sub>t</sub> = 4.49 min

(CI, *m/z*): found 129.0909 [M+H]<sup>+</sup> (calculated 129.0910).

The data corresponds to the literature values.<sup>9</sup>

## Cyclohex-2-en-1-yl acetate

Synthesized according to procedure B.

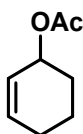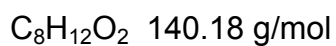

|                                |                                                                                                                                                                                                |
|--------------------------------|------------------------------------------------------------------------------------------------------------------------------------------------------------------------------------------------|
| <b>Yield</b>                   | 1.20 g, 8.6 mmol, 57%                                                                                                                                                                          |
| <b><math>^1H</math>-NMR</b>    | (300 MHz, Chloroform-d) $\delta$ 5.95 (dtd, J = 10.1, 3.7, 1.3 Hz, 1H), 5.70 (dtd, J = 10.1, 4.0, 2.2 Hz, 1H), 5.25 (tdq, J = 5.6, 3.5, 2.0 Hz, 1H), 2.22 – 1.75 (m, 6H), 1.75 – 1.53 (m, 3H). |
| <b><math>^{13}C</math>-NMR</b> | (75 MHz, $CDCl_3$ ) $\delta$ 170.79, 132.71, 125.66, 68.08, 28.28, 24.86, 21.45, 18.85.                                                                                                        |
| <b>GC-MS</b>                   | $R_f$ = 5.22 min<br>(EI, 70 eV, m/z): 140 $[M]^+$ , 98, 79, 77, 70, 65, 53, 51.                                                                                                                |

The data corresponds to the literature values.<sup>7</sup>

### Alkenylation-Acetylation Reactions

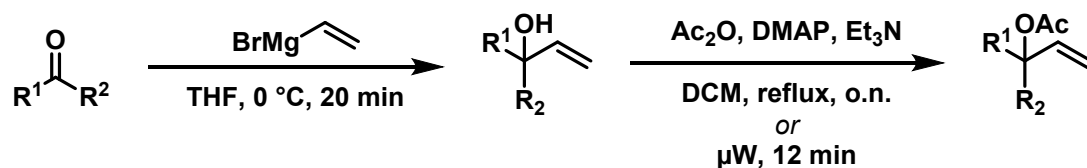

#### General procedures:

**Alkenylation:** To a solution of the ketone (10 mmol, 1 equiv.) in THF (20 mL) was added vinylmagnesium bromide (1.0 M in THF, 12 mmol, 1.2 equiv.) under nitrogen at 0 °C and the reaction was stirred for 20 minutes. The reaction was then quenched with a saturated aqueous NH<sub>4</sub>Cl solution and extracted with diethyl ether. The combined organic layers were washed with brine, dried over sodium sulfate, filtered and evaporated to give the crude allylic alcohol that was engaged in the next step without further purification.

**Acylation:** The acylation of allylic alcohols was carried out using microwave-assisted heating conditions described as follow. The allylic alcohol (10 mmol, 1 equiv.), Et<sub>3</sub>N (5.6 mL, 40 mmol, 4 equiv.), Ac<sub>2</sub>O (1.8 mL, 20 mmol, 2 equiv.) and DMAP (0.360 g, 3.0 mmol, 0.3 equiv), were added in turn in a microwave-designed vial. The reaction mixture was heated under microwave-assisted heating at 100 °C for 12 min. The reaction was then quenched with a saturated aqueous NH<sub>4</sub>Cl solution and extracted with diethyl ether. The combined organic layers were washed with brine, dried over sodium sulfate, filtered and evaporated to give a crude product that was purified by flash chromatography on silica gel.

#### **1-vinylcyclohexyl acetate**

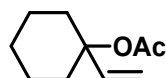

C<sub>10</sub>H<sub>16</sub>O<sub>2</sub> 168.24 g/mol

**Yield** 350 mg, 2.1 mmol, 27%

|                           |                                                                                                                                                                         |
|---------------------------|-------------------------------------------------------------------------------------------------------------------------------------------------------------------------|
| <b><sup>1</sup>H-NMR</b>  | (300 MHz, Chloroform-d) δ 6.10 (dd, J = 17.7, 11.0 Hz, 1H), 5.22 – 5.07 (m, 2H), 2.17 (q, J = 6.5, 6.1 Hz, 2H), 2.02 (s, 3H), 1.65 – 1.39 (m, 6H), 1.35 – 1.20 (m, 2H). |
| <b><sup>13</sup>C-NMR</b> | (75 MHz, CDCl <sub>3</sub> ) δ 169.94, 141.97, 113.54, 81.78, 34.88, 25.37, 22.17, 21.88.                                                                               |
| <b>GC-MS</b>              | R <sub>t</sub> = 4.70 min<br>(EI, 70 eV, m/z): 126 [M-Ac] <sup>+</sup> , 111, 108, 93, 91, 83, 79, 77, 55.                                                              |

The data corresponds to the literature values.<sup>10</sup>

### 1-phenylallyl acetate

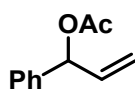

C<sub>11</sub>H<sub>12</sub>O<sub>2</sub> 176.22 g/mol

|                          |                                                                                                                                                           |
|--------------------------|-----------------------------------------------------------------------------------------------------------------------------------------------------------|
| <b>Yield</b>             | 1.41 g, 8.0 mmol, 89%                                                                                                                                     |
| <b><sup>1</sup>H-NMR</b> | (300 MHz, Chloroform-d) δ 7.44 – 7.24 (m, 5H), 6.27 (dt, J = 5.9, 1.4 Hz, 1H), 6.01 (ddd, J = 17.1, 10.4, 5.9 Hz, 1H), 5.37 – 5.20 (m, 2H), 2.12 (s, 3H). |
| <b>GC-MS</b>             | R <sub>t</sub> = 6.58 min<br>(EI, 70 eV, m/z): 176 [M] <sup>+</sup> , 134, 116, 105, 91, 77, 65, 55.                                                      |

The data corresponds to the literature values.<sup>10</sup>

### Synthesis of the Grignard reagents

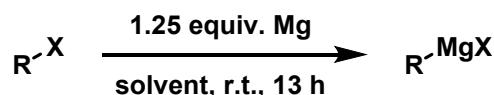

R = Alkyl, Aryl  
X = Cl, Br, I

Representative procedure on the example of 1-Bromononane in Et<sub>2</sub>O: All reaction steps were carried out under inert gas atmosphere (N<sub>2</sub>). 1-Bromononane (40 mmol, 7.6 mL) was added dropwise to a suspension of magnesium turnings (50 mmol, 1.22 g) in Et<sub>2</sub>O (30 mL) at room temperature over a period of 1 hour using a syringe pump. The reaction solution was then stirred at room temperature for 12 hours.<sup>11</sup>

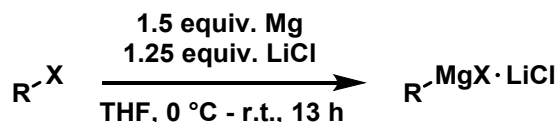

R = Alkyl, Aryl  
X = Cl, Br

Representative procedure on the example of 1-Bromononane: All reaction steps were carried out under inert gas atmosphere (N<sub>2</sub>). 1-Bromononane (20 mmol, 3.8 mL) was added dropwise to a suspension of magnesium turnings (30 mmol, 0.73 g) and LiCl (25 mmol, 1.06 g) in THF (15 mL) at 0 °C over a period of 1 hour using a syringe pump. The reaction solution was then stirred at room temperature for 12 hours.

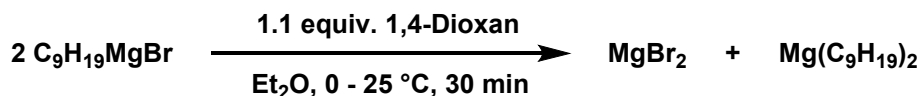

All reaction steps were carried out in an Argon-filled glovebox. A 1.0 M *n*-nonyl-magnesium bromide solution in Et<sub>2</sub>O (3 mmol, 3 mL) was added dropwise over a period of 5 minutes to a solution of dry 1,4-dioxane (3.3 mmol, 291 mg) in absolute Et<sub>2</sub>O (2 mL) at 0 °C. The mixture was then stirred at room temperature for 30 minutes and the precipitate formed was filtered off by means of a syringe filter.



Grignard solutions were titrated with salicylaldehyde phenylhydrazone (0.25 mmol, 53 mg) as indicator in THF (4 mL) to determine their concentration.<sup>12</sup>

### 3 Iron-catalysed cross-coupling reactions

#### Procedures

##### Procedure during optimization

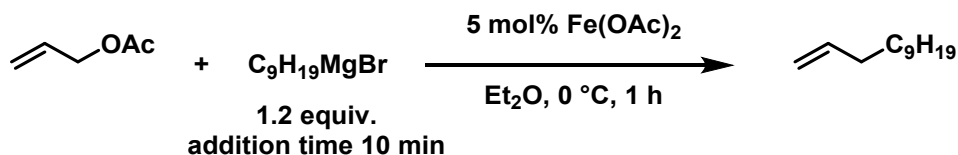

A suspension of  $\text{Fe}(\text{OAc})_2$  (0.025 mmol, 4.3 mg) in absolute  $\text{Et}_2\text{O}$  (2 mL) was cooled to 0 °C under a nitrogen atmosphere in a flame dried reaction tube. After the addition of freshly distilled allyl acetate (0.5 mmol, 54  $\mu\text{L}$ ), a 1.0 M *n*-nonylmagnesium bromide solution (0.6 mmol, 0.6 mL) in  $\text{Et}_2\text{O}$  was added dropwise over a period of 10 minutes and the mixture was stirred at 0 °C for 1 hour. The reaction mixture was then hydrolyzed with a saturated  $\text{NH}_4\text{Cl}$  solution and the aqueous phase was extracted with  $\text{EtOAc}$ . Yields were determined by quantitative GC-FID vs. internal *n*-pentadecane.

##### Protocol A

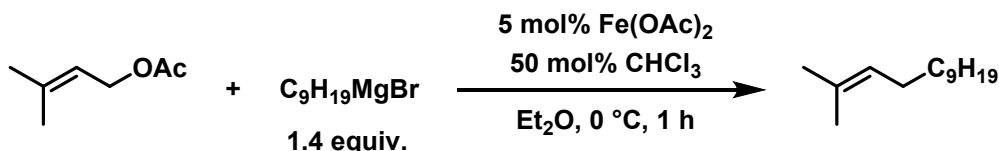

Representative procedure on the example of 2-methyltridec-2-ene: A suspension of  $\text{Fe}(\text{OAc})_2$  (0.025 mmol, 4.3 mg) and dry  $\text{CHCl}_3$  (0.25 mmol, 20  $\mu\text{l}$ ) in absolute  $\text{Et}_2\text{O}$  (2 mL) was cooled to 0 °C under a nitrogen atmosphere in a flame dried reaction tube. After the addition of freshly distilled prenyl acetate (0.5 mmol, 70  $\mu\text{L}$ ), a 1.0 M *n*-nonylmagnesium bromide solution (0.7 mmol, 0.7 mL) in  $\text{Et}_2\text{O}$  was added dropwise over a period of 45 minutes and the mixture was stirred at 0 °C for 1 hour. The reaction mixture was then hydrolyzed with a saturated  $\text{NH}_4\text{Cl}$  solution and the aqueous phase was extracted with  $\text{EtOAc}$ . The solvent was removed under reduced pressure. Product purification was carried out by kugelrohr distillation at 150 °C at 20 mbar.

##### Protocol B

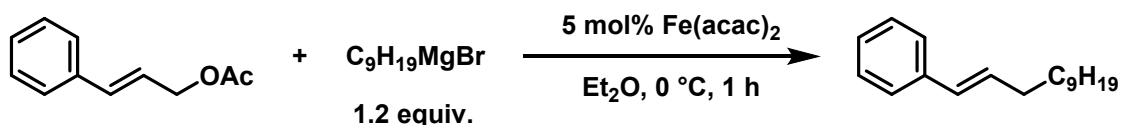

Representative procedure on the example of (*E*)-1-phenyldodec-1-ene: A suspension of  $Fe(acac)_2$  (0.025 mmol, 6.4 mg) in absolute  $Et_2O$  (2 mL) was cooled to 0 °C under a nitrogen atmosphere in a flame dried reaction tube. After the addition cinnamyl acetate (0.5 mmol, 84  $\mu$ L), a 1.0 M *n*-nonylmagnesium bromide solution (0.7 mmol, 0.7 mL) in  $Et_2O$  was added dropwise over a period of 10 minutes and the mixture was stirred at 0 °C for 1 hour. The reaction mixture was then hydrolyzed with a saturated  $NH_4Cl$  solution and the aqueous phase was extracted with  $EtOAc$ . The solvent was removed under reduced pressure. The crude product was purified by column chromatography.

#### *Cross Coupling with subsequent hydrogenation*

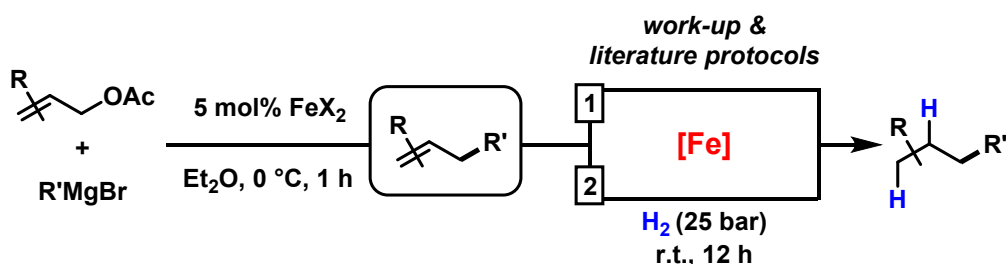

For Route 1, the isolated product of the coupling reaction was hydrogenated according to literature.<sup>13</sup> The products were analyzed via GC-MS and GC-FID.

For Route 2, the reaction was carried out according to Condition A (without addition of  $CHCl_3$ ) or B in an autoclave vial. After completion of the reaction, a small sample was taken out for quantitative GC-FID, and the vial was transferred into an argon-filled glovebox. The septum was penetrated with a cannula and the reaction vial was put into an autoclave, which was set under a pressure of 25 bar of  $H_2$ . The reaction was stirred overnight and then quenched with aqueous  $NH_4Cl$  solution. The organic phase was extracted with ethyl acetate, dried over sodium sulfate and filtered over a short layer of silica. The products were analyzed via GC-MS and GC-FID.

Optimization experiments with allyl acetate

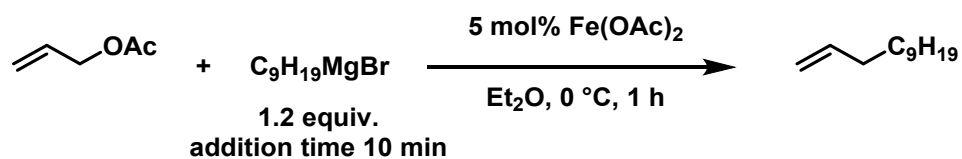

| Entry     | Change of reaction conditions         | Yield [%] <sup>[a]</sup> |
|-----------|---------------------------------------|--------------------------|
| 1         | Fe(OAc) <sub>2</sub> (99.99%)         | 73                       |
| 2         | Pd(OAc) <sub>2</sub>                  | Traces                   |
| 3         | Pd(PPh <sub>3</sub> ) <sub>4</sub>    | Traces                   |
| 4         | Co(OAc) <sub>2</sub>                  | Traces                   |
| 5         | NiBr <sub>2</sub>                     | Traces                   |
| 6         | CuBr                                  | 78 (<5 <sup>[b]</sup> )  |
| 7         | none                                  | 0                        |
| 8         | FeCl <sub>2</sub>                     | 58                       |
| 9         | FeCl <sub>3</sub>                     | 61                       |
| 10        | FeBr <sub>2</sub>                     | 66                       |
| 11        | FeI <sub>2</sub> x 2 THF              | 51                       |
| <b>12</b> | <b>Fe(OAc)<sub>2</sub></b>            | <b>71</b>                |
| 13        | Fe(acac) <sub>2</sub>                 | 66                       |
| 14        | Fe(acac) <sub>3</sub>                 | 59                       |
| 15        | Fe(N(TMS) <sub>2</sub> ) <sub>2</sub> | 45                       |
| 16        | Fe(OTf) <sub>3</sub>                  | 48                       |
| 17        | 1                                     | 62                       |
| 18        | 3                                     | 54                       |
| 19        | 5                                     | 71                       |
| 20        | 8                                     | 72                       |
| <b>21</b> | <b>10</b>                             | <b>78</b>                |
| 22        | 12                                    | 77                       |
| 23        | 15                                    | 78                       |
| 24        | Heptane                               | 4                        |
| <b>25</b> | <b>Et<sub>2</sub>O</b>                | <b>71</b>                |
| 26        | Et <sub>2</sub> O/NMP (20/1)          | 20                       |
| 27        | Toluene                               | 41                       |
| 28        | Et <sub>2</sub> O/Toluene (3/1)       | 70                       |
| 29        | Et <sub>2</sub> O/Toluene (1/1)       | 71                       |
| 30        | Et <sub>2</sub> O/Toluene (1/3)       | 70                       |
| 31        | EtOAc                                 | 63                       |
| 32        | DME                                   | 44                       |

|           |                            |                                           |                         |
|-----------|----------------------------|-------------------------------------------|-------------------------|
| 33        |                            | MTBE                                      | 55                      |
| 34        |                            | 0.5                                       | 75 <sup>[c]</sup>       |
| 35        | Grignard concentration [M] | 1.0                                       | 78 <sup>[c]</sup>       |
| 36        |                            | 2.0                                       | 78 <sup>[c]</sup>       |
| 37        |                            | -20                                       | 30 <sup>[c]</sup>       |
| 38        | Temperature [°C]           | -10                                       | 66 <sup>[c]</sup>       |
| <b>39</b> |                            | <b>0</b>                                  | <b>78<sup>[c]</sup></b> |
| 40        |                            | 25                                        | 73 <sup>[c]</sup>       |
| 41        |                            | 12.5 mol% dppp                            | 0 <sup>[c]</sup>        |
| 42        |                            | 25 mol% IPr·HCl                           | 52 <sup>[c]</sup>       |
| 43        |                            | 25 mol% NEt <sub>3</sub>                  | 61 <sup>[c]</sup>       |
| 44        | Additives                  | 12.5 mol% TMEDA                           | 62 <sup>[c]</sup>       |
| 45        |                            | 12.5 mol% DABCO                           | 62 <sup>[c]</sup>       |
| 46        |                            | 12.5 mol% CH <sub>2</sub> Cl <sub>2</sub> | 55 <sup>[c]</sup>       |
| 47        |                            | 12.5 mol% Glucosamin·HCl                  | 70 <sup>[c]</sup>       |

<sup>[a]</sup> Yields were determined by quantitative GC-FID vs. internal *n*-pentadecane. <sup>[b]</sup> 0.01 mol% CuBr  
<sup>[c]</sup> 10 mol% Fe(OAc)<sub>2</sub>.

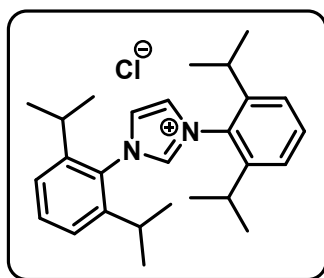

**IPr·HCl**



## Application of ArMgBr

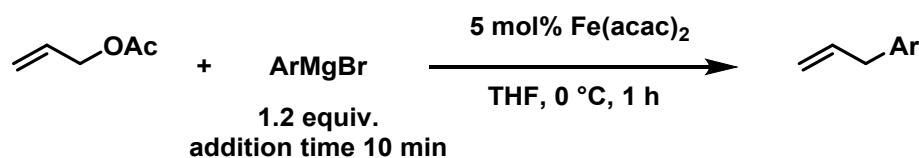

| Entry | Change of reaction conditions | ArMgBr                      | Yield [%] <sup>[a]</sup> |
|-------|-------------------------------|-----------------------------|--------------------------|
| 1     | None                          |                             | 0                        |
| 2     | FeCl <sub>2</sub>             |                             | 80                       |
| 3     | FeBr <sub>2</sub>             |                             | 66                       |
| 4     | Fe(OAc) <sub>2</sub>          |                             | 52                       |
| 5     | Iron Precursor                | <b>Fe(acac)<sub>2</sub></b> | <b>83</b>                |
| 6     |                               | in THF                      | 65                       |
| 7     | FeBr <sub>2</sub>             |                             | 52 <sup>[b]</sup>        |
| 8     | Fe(OAc) <sub>2</sub>          |                             | 17 <sup>[b]</sup>        |
| 9     |                               | <b>Fe(acac)<sub>2</sub></b> | <b>65<sup>[b]</sup></b>  |
| 10    |                               | in Et <sub>2</sub> O        |                          |
| 11    | <b>THF</b>                    |                             | <b>83</b>                |
| 12    | THF/NMP (20/1)                |                             | 74                       |
| 13    | Et <sub>2</sub> O             |                             | 81                       |
| 14    | Toluol                        |                             | 82                       |
| 15    | Benzol                        |                             | 68 <sup>[c]</sup>        |
| 16    | Solvent                       |                             |                          |
| 17    | Et <sub>2</sub> O             |                             | 55                       |
| 18    | THF                           |                             | 55                       |
| 19    |                               |                             |                          |
| 20    | Temperature [°C]              |                             |                          |
| 21    |                               |                             |                          |
| 22    |                               |                             |                          |
| 23    |                               |                             |                          |
| 24    |                               |                             |                          |
| 25    |                               |                             |                          |
| 26    |                               |                             |                          |
| 27    |                               |                             |                          |

<sup>[a]</sup> Yields were determined by quantitative GC-FID vs. internal *n*-pentadecane. <sup>[b]</sup> Reaction was run in Et<sub>2</sub>O. <sup>[c]</sup> Reaction temperature 25 °C.

Optimization experiments with alkyl-substituted acetates

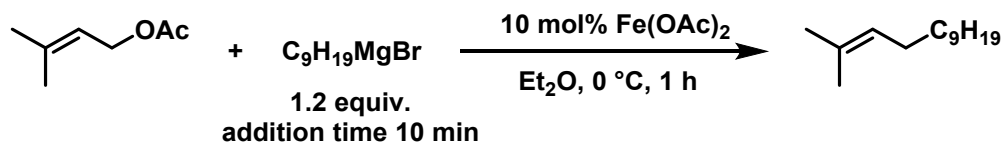

| Entry | Change of reaction conditions             | Conversion [%] <sup>[a]</sup> | Yield [%] <sup>[a]</sup> |
|-------|-------------------------------------------|-------------------------------|--------------------------|
| 1     | <b>Fe(OAc)<sub>2</sub></b>                | <b>89</b>                     | <b>15</b>                |
| 2     | Fe(acac) <sub>2</sub>                     | 84                            | 3                        |
| 3     | Iron Precursor<br>FeCl <sub>2</sub>       | 76                            | 9                        |
| 4     | FeBr <sub>2</sub>                         | 76                            | 1                        |
| 5     | Fe(OTf) <sub>3</sub>                      | 76                            | 3                        |
| 6     | 25 mol% IPr·HCl                           | 73                            | 3                        |
| 7     | 25 mol% NEt <sub>3</sub>                  | 81                            | 14                       |
| 8     | 12.5 mol% TMEDA                           | 84                            | 5                        |
| 9     | Additives<br>12.5 mol% DABCO              | 82                            | 7                        |
| 10    | 12.5 mol% CH <sub>2</sub> Cl <sub>2</sub> | 81                            | 21                       |
| 11    | <b>12.5 mol% CHCl<sub>3</sub></b>         | <b>83</b>                     | <b>38</b>                |
| 12    | 12.5 mol% Glucosamin·HCl                  | 100                           | 11                       |
| 13    | iPr <sub>2</sub> O                        | 69                            | 32                       |
| 14    | Bu <sub>2</sub> O                         | 65                            | 17                       |
| 15    | CPME                                      | 83                            | 48                       |
| 16    | Solvents<br>2-Methyl-THF                  | 32                            | 13                       |
| 17    | Dioxane                                   | 57                            | <1                       |
| 18    | Dioxolane                                 | 13                            | <1                       |
| 19    | TEGDME                                    | 18                            | 2                        |

<sup>[a]</sup> Yields were determined by quantitative GC-FID vs. internal *n*-pentadecane.



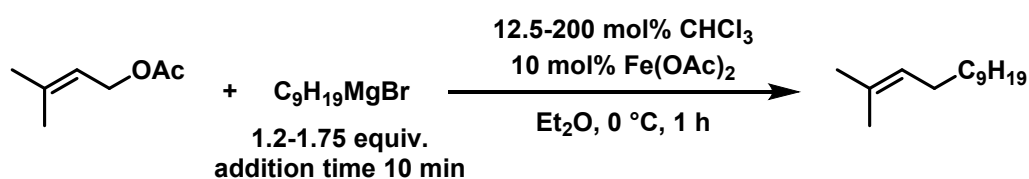

| Entry    | CHCl <sub>3</sub> [mol%] | equiv.<br>C <sub>9</sub> H <sub>19</sub> MgBr | Conversion[%] <sup>[a]</sup> | Yield [%] <sup>[a]</sup>                           |
|----------|--------------------------|-----------------------------------------------|------------------------------|----------------------------------------------------|
| 1        |                          | 1.2                                           | 89                           | 12                                                 |
| 2        | 0                        | 1.35                                          | 90                           | 12                                                 |
| 3        |                          | 1.2                                           | 83                           | 38                                                 |
| 4        | 12.5                     | 1.35                                          | 93                           | 34                                                 |
| 5        |                          | 1.2                                           | 85                           | 38                                                 |
| 6        | 25                       | 1.35                                          | 100                          | 42                                                 |
| 7        |                          | 1.5                                           | 90                           | 39                                                 |
| 8        |                          | 1.2                                           | 80                           | 41                                                 |
| <b>9</b> | <b>50</b>                | <b>1.35</b>                                   | <b>89</b>                    | <b>46</b> (42 <sup>[b]</sup> , 43 <sup>[c]</sup> ) |
| 10       |                          | 1.5                                           | 93                           | 50                                                 |
| 11       |                          | 1.75                                          | 99                           | 53                                                 |
| 12       |                          | 1.2                                           | 79                           | 41                                                 |
| 13       |                          | 1.35                                          | 77                           | 41                                                 |
| 14       | 100                      | 1.5                                           | 80                           | 42                                                 |
| 15       |                          | 1.75                                          | 90                           | 54                                                 |
| 16       |                          | 1.2                                           | 68                           | 40                                                 |
| 17       |                          | 1.35                                          | 75                           | 41                                                 |
| 18       | 200                      | 1.5                                           | 74                           | 43                                                 |
| 19       |                          | 1.75                                          | 76                           | 48                                                 |

<sup>[a]</sup> Yields were determined by quantitative GC-FID vs. internal *n*-pentadecane. <sup>[b]</sup> Grignard concentration 0.5 M. <sup>[c]</sup> Grignard concentration 2.0 M.

To remain in a reasonable amount of required chloroform and Grignard reagent, the reaction conditions were chosen to be 1.4 equiv. of the organomagnesiumbromide and 50 mol% CHCl<sub>3</sub>.

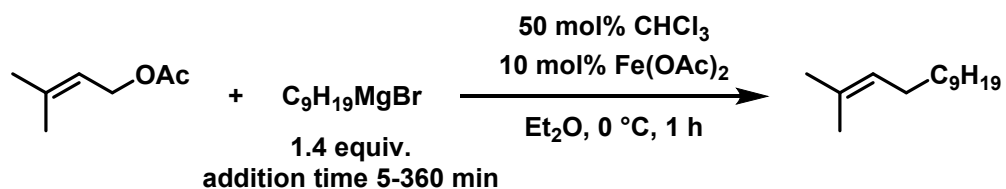

| Entry | Addition time [min] | Conversion[%] <sup>[a]</sup>    | Yield [%] <sup>[a]</sup>       |
|-------|---------------------|---------------------------------|--------------------------------|
| 1     | 5                   | 68                              | 22                             |
| 2     | 10                  | 89 (89 <sup>[b]</sup> )         | 45 (15 <sup>[b]</sup> )        |
| 3     | 20                  | 84                              | 52                             |
| 4     | 30                  | 100                             | 50                             |
| 5     | <b>45</b>           | <b>99</b> (100 <sup>[b]</sup> ) | <b>64</b> (35 <sup>[b]</sup> ) |
| 6     | 60                  | 94 (89 <sup>[b]</sup> )         | 61(31 <sup>[b]</sup> )         |
| 7     | 180                 | 100 <sup>[b]</sup>              | 50 <sup>[b]</sup>              |
| 8     | 360                 | 100 <sup>[b]</sup>              | 62 <sup>[b]</sup>              |

<sup>[a]</sup> Yields were determined by quantitative GC-FID vs. internal *n*-pentadecane. <sup>[b]</sup> Without CHCl<sub>3</sub>.

Optimization experiments with aryl-substituted acetates

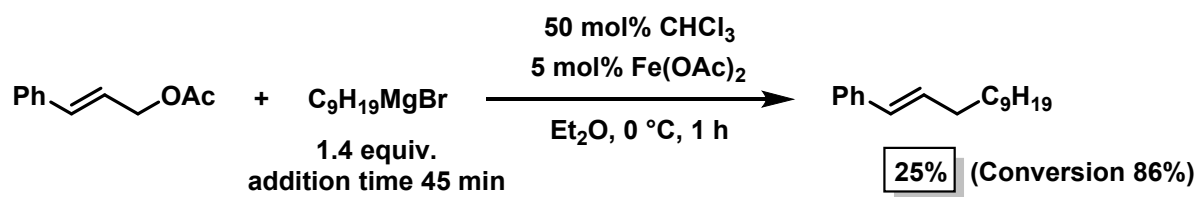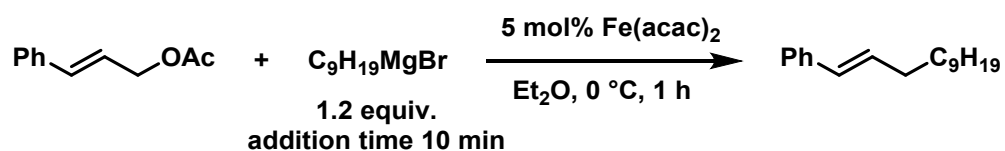

| Entry | Change of reaction conditions | Conversion [%] <sup>[a]</sup>         | Yield [%] <sup>[a]</sup> |
|-------|-------------------------------|---------------------------------------|--------------------------|
| 1     | <chem>Fe(OAc)2</chem>         | 65                                    | 9                        |
| 2     | Iron Precursor                | <b><chem>Fe(acac)2</chem></b>         | <b>100</b>               |
| 3     |                               | <chem>FeCl2</chem>                    | 100                      |
| 4     |                               | <chem>FeBr2</chem>                    | 100                      |
| 5     |                               | 12.5 mol% <chem>PPh3</chem>           | 100                      |
| 6     | Additives                     | 12.5 mol% <chem>IPr-HCl</chem>        | 67                       |
| 7     |                               | 12.5 mol% <chem>NEt3</chem>           | 60                       |
| 8     |                               | 6.25 mol% <chem>TMEDA</chem>          | 58                       |
| 9     |                               | 6.25 mol% <chem>DABCO</chem>          | 53                       |
| 10    |                               | 12.5 mol% <chem>CHCl3</chem>          | 67                       |
| 11    |                               | 12.5 mol% <chem>Glucosamin-HCl</chem> | 61                       |
| 12    | Addition time [min]           | 5                                     | 58                       |
| 13    |                               | 20                                    | 68                       |

## Isolated products

### 2-methyltridec-2-ene

Synthesized according to procedure A.

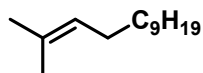

$C_{14}H_{28}$  196.38 g/mol

**$^1H$ -NMR** (300 MHz,  $CDCl_3$ )  $\delta_H$  [ppm] = 5.18 - 5.06 (m, 1H), 2.01 - 1.90 (m, 2H), 1.69 (d,  $J = 1.0$  Hz, 3H), 1.60 (s, 3H), 1.26 (s, 16H), 0.88 (t,  $J = 6.7$  Hz, 3H).

**$^{13}C$ -NMR** (101 MHz,  $CDCl_3$ )  $\delta_C$  [ppm] = 131.1, 125.0, 31.9, 29.9, 29.7, 29.7, 29.6, 29.4, 29.4, 28.1, 25.7, 22.7, 17.6, 14.1.

**GC-MS** (EI, 70 eV,  $m/z$ ): 196  $[M]^+$ , 111, 97, 83, 69, 56.

The data corresponds to the literature values.<sup>14</sup>

### dodec-1-ene

Synthesized according to procedure A.

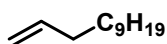

$C_{12}H_{24}$  168.32 g/mol

**$^1H$ -NMR** (400 MHz,  $CDCl_3$ )  $\delta_H$  [ppm] = 5.82 (ddt,  $J = 16.9, 10.2, 6.7$  Hz, 1H), 4.99 (ddd,  $J = 17.1, 3.6, 1.6$  Hz, 1H), 4.93 (ddt,  $J = 10.2, 2.2, 1.2$  Hz, 1H), 2.08 - 2.00 (m, 2H), 1.41 - 1.22 (m, 16H), 0.88 (t,  $J = 6.8$  Hz, 3H).

**$^{13}C$ -NMR** (101 MHz,  $CDCl_3$ )  $\delta_C$  [ppm] = 139.3, 114.1, 33.8, 31.9, 29.6, 29.6, 29.5, 29.4, 29.2, 29.0, 22.7, 14.1.

**GC-MS** (EI, 70 eV,  $m/z$ ): 168  $[M]^+$ , 140, 111, 97, 83, 69, 56.

The data corresponds to the literature values.<sup>15</sup>

### tridec-2-ene

Synthesized according to procedure A.

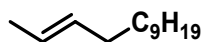

$C_{13}H_{26}$  182.35 g/mol

**$^1H$ -NMR** (300 MHz,  $CDCl_3$ )  $\delta_H$  [ppm] = 5.44 - 5.37 (m, 2H), 2.00 - 1.90 (m, 2H), 1.66 - 1.62 (m, 3H), 1.36 - 1.21 (m, 16H), 0.88 (t,  $J$  = 6.7 Hz, 3H).

**$^{13}C$ -NMR** (75 MHz,  $CDCl_3$ )  $\delta_C$  [ppm] = 131.7, 124.5, 32.6, 31.9, 31.0, 29.7, 29.7, 29.6, 29.4, 29.2, 22.7, 18.0, 14.1.

**GC-MS** (EI, 70 eV, m/z): 182  $[M]^+$ , 125, 111, 97, 83, 69, 55.

The data corresponds to the literature values.<sup>15</sup>

### (*E*)-octadec-7-ene

Synthesized according to procedure A. Product purification by filtration over silica (hexanes).

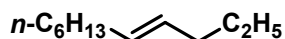

$C_{11}H_{22}$  154.30 g/mol

**$^1H$ -NMR** (300 MHz,  $CDCl_3$ )  $\delta_H$  [ppm] = 5.45 - 5.30 (m, 2H), 2.06 - 1.84 (m, 4H), 1.38 - 1.21 (m, 10H), 0.88 (t,  $J$  = 7.4 Hz, 6H).

**$^{13}C$ -NMR** (75 MHz,  $CDCl_3$ )  $\delta_C$  [ppm] = 130.6, 130.1, 34.7, 32.7, 31.8, 29.7, 28.9, 22.8, 22.7, 14.1, 13.7.

**GC-HRMS** (EI, 70 eV m/z): found 154.17198  $[M]^{+*}$  (calculated 154.17160).

### (*E*)-3-methyltridec-2-ene

Synthesized according to procedure A.

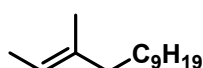

$C_{14}H_{28}$  196.38 g/mol

**<sup>1</sup>H-NMR** (300 MHz, Chloroform-d) δ 5.17 – 5.06 (m, 1H), 1.87 (m, 2H), 1.54 – 1.42 (m, 6H), 1.19 (m, 16H), 0.86 – 0.75 (m, 3H).

**<sup>13</sup>C-NMR** (75 MHz, CDCl<sub>3</sub>) δ 136.22, 117.93, 39.72, 31.94, 29.67, 29.60, 29.37, 28.02, 22.71, 15.57, 14.14, 13.33.

**GC-MS** (EI, 70 eV, m/z): 196 [M]<sup>+</sup>, 111, 97, 83, 70, 55.

The data corresponds to the literature values.<sup>15</sup>

### 2-methyldodec-1-ene

Synthesized according to procedure A. The purified product contains octadecane, wherein the separation has failed.

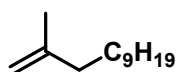

C<sub>13</sub>H<sub>26</sub> 182.35 g/mol

**<sup>1</sup>H-NMR** (300 MHz, Chloroform-d) δ 4.65 – 4.55 (m, 2H), 1.93 (t, J = 7.5 Hz, 2H), 1.65 – 1.62 (m, 3H), 1.28 – 1.10 (m, 16H), 0.87 – 0.75 (m, 3H).

**<sup>13</sup>C-NMR** (75 MHz, CDCl<sub>3</sub>) δ 146.4, 109.5, 37.9, 31.9, 29.6, 29.4, 27.7, 22.7, 22.4, 14.1.

**GC-MS** (EI, 70 eV, m/z): 182 [M]<sup>+</sup>, 154, 126, 111, 97, 83, 69, 56.

The data corresponds to the literature values.<sup>16</sup>

### (E)-2,6-dimethyldeca-2,6-diene

Synthesized according to procedure A.

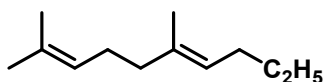

C<sub>12</sub>H<sub>22</sub> 166.31 g/mol

**<sup>1</sup>H-NMR** (300 MHz, Chloroform-d) δ 5.10 – 5.00 (m, 2H), 2.05 – 1.80 (m, 6H), 1.64 – 1.59 (m, 6H), 1.56 – 1.54 (s, 3H) 1.34 – 1.20 (m, 2H), 0.86 – 0.69 (m, 3H).

**<sup>13</sup>C-NMR** (75 MHz, CDCl<sub>3</sub>) δ 135.1, 131.5, 125.4, 124.4, 32.0, 30.0, 26.7, 25.7, 23.4, 23.2, 17.6, 13.9.

**GC-HRMS** (EI, 70 eV m/z): found 166.17172 [M]<sup>+</sup> (calculated 166.17160).

### 3-ethylcyclohex-1-ene

Synthesized according to procedure A.

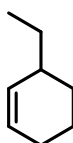

C<sub>8</sub>H<sub>14</sub> 110.20 g/mol

**<sup>1</sup>H-NMR** (300 MHz, Chloroform-d) δ 5.72 – 5.51 (m, 2H), 2.03 – 1.89 (m, 3H), 1.85 – 1.10 (m, 6H), 0.91 (t, J = 7.4 Hz, 3H).

**<sup>13</sup>C-NMR** (75 MHz, CDCl<sub>3</sub>) δ 132.1, 126.74, 36.9, 29.1, 28.7, 25.5, 21.6, 11.5.

**GC-MS** (EI, 70 eV, m/z): 110 [M]<sup>+</sup>, 95, 81, 67, 53.

The data corresponds to the literature values.<sup>17</sup>

### Undecylidenecyclohexane

Synthesized according to procedure A. The purified product contains octadecane, wherein the separation has failed.

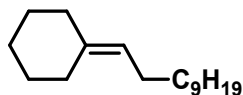

C<sub>17</sub>H<sub>32</sub> 236.44 g/mol

**<sup>1</sup>H-NMR** (300 MHz, Chloroform-d) δ 5.06 (tt, J = 7.3, 1.3 Hz, 1H), 2.16 – 1.89 (m, 6H), 1.57 – 1.41 (m, 6H), 1.26 (m, 16H), 0.94 – 0.82 (m, 3H).

**<sup>13</sup>C-NMR** (75 MHz, CDCl<sub>3</sub>) δ<sub>C</sub> [ppm] = 130.6, 130.1, 34.7, 32.7, 31.8, 29.7, 28.9, 22.8, 22.7, 14.1, 13.7.

**GC-HRMS** (EI, 70 eV, m/z): found 236.2500 [M]<sup>+</sup> (calculated 235.2499).

### Allylcyclohexane

Synthesized according to procedure A.

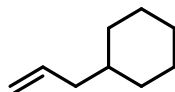

C<sub>9</sub>H<sub>16</sub> 124.23 g/mol

**<sup>1</sup>H-NMR** (300 MHz, Chloroform-d) δ 5.72 (ddt, J = 17.4, 10.4, 7.2 Hz, 1H), 4.96 – 4.81 (m, 2H), 1.87 (m, 2H), 1.65 (s, 5H), 1.29 – 0.98 (m, 4H), 0.95 – 0.71 (m, 2H).

**<sup>13</sup>C-NMR** (75 MHz, CDCl<sub>3</sub>) δ 137.71, 115.13, 41.95, 37.67, 33.07, 26.58, 26.34.

**GC-MS** (EI, 70 eV, m/z): 124 [M]<sup>+</sup>, 83, 67, 55.

### 1-(non-8-en-1-yl)-1H-indole

Synthesized according to procedure A. The purified product contains 1-hexyl-1H-indole, wherein the separation has failed.

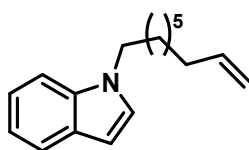

C<sub>17</sub>H<sub>23</sub>N 241.38 g/mol

**TLC** R<sub>f</sub> = 0.3 (hexanes/ethylacetate = 200/1)

**<sup>1</sup>H-NMR** (300 MHz, Chloroform-d) δ 7.62 – 6.91 (m, 5H), 6.41 (d, J = 3.1 Hz, 1H), 5.81 – 5.61 (m, 1H), 4.99 – 4.78 (m, 2H), 4.03 (td, J = 7.1, 2.2 Hz, 2H), 1.97 (dq, J = 14.1, 7.0 Hz, 2H), 1.83 – 1.68 (m, 2H), 1.35 – 1.04 (m, 8H).

**GC-HRMS** (EI, 70 eV, m/z): found 241.1824 [M]<sup>+</sup> (calculated 241.1825).



### (hept-6-en-1-yloxy)benzene

Synthesized according to procedure A. The purified product contains butoxybenzene, wherein the separation has failed.

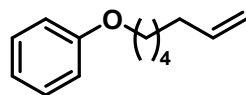

C<sub>13</sub>H<sub>18</sub>O 190.29 g/mol

|                           |                                                                                                                                                                                                             |
|---------------------------|-------------------------------------------------------------------------------------------------------------------------------------------------------------------------------------------------------------|
| <b><sup>1</sup>H-NMR</b>  | (300 MHz, Chloroform-d) δ 7.26 – 7.11 (m, 2H), 6.91 – 6.73 (m, 3H), 5.74 (ddt, J = 16.9, 10.2, 6.6 Hz, 1H), 5.02 – 4.80 (m, 2H), 3.88 (t, J = 6.5 Hz, 2H), 2.00 (m, 2H), 1.80 – 1.62 (m, 2H), 1.40 (m, 4H). |
| <b><sup>13</sup>C-NMR</b> | (75 MHz, CDCl <sub>3</sub> ) δ 159.11, 138.85, 129.41, 120.49, 114.50, 67.77, 33.72, 29.18, 28.69, 25.60.                                                                                                   |
| <b>GC-HRMS</b>            | (EI, 70 eV m/z): found 190.13483 [M] <sup>+</sup> (calculated 190.13522).                                                                                                                                   |

### (E)-1-phenyldodec-1-ene

Synthesized according to procedure B.

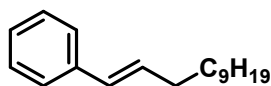

C<sub>18</sub>H<sub>28</sub> 244.42 g/mol

|                           |                                                                                                                                                                                                                                     |
|---------------------------|-------------------------------------------------------------------------------------------------------------------------------------------------------------------------------------------------------------------------------------|
| <b>TLC</b>                | R <sub>f</sub> = 0.8 (hexanes)                                                                                                                                                                                                      |
| <b><sup>1</sup>H-NMR</b>  | (300 MHz, CDCl <sub>3</sub> ) δ <sub>H</sub> [ppm] = 7.41 - 7.14 (m, 5H), 6.38 (d, J = 15.8 Hz, 1H), 6.23 (dt, J = 15.8, 6.7 Hz, 1H), 2.21 (td, J = 7.7, 1.0 Hz, 2H), 1.56 - 1.40 (m, 2H), 1.28 (s, 14H), 0.89 (t, J = 6.7 Hz, 3H). |
| <b><sup>13</sup>C-NMR</b> | (101 MHz, CDCl <sub>3</sub> ) δ <sub>C</sub> [ppm] = 138.0, 131.3, 129.7, 128.5, 126.7, 125.9, 33.1, 31.9, 29.6, 29.6, 29.4, 29.4, 29.4, 22.7, 14.1.                                                                                |
| <b>GC-MS</b>              | (EI, 70 eV, m/z): 244 [M] <sup>+</sup> , 171, 145, 129, 117, 104, 91, 77, 67, 55.                                                                                                                                                   |

The data correspond to the literature values.<sup>18</sup>

### (E)-1-(4-methylphenyl)-dodec-1-ene

Synthesized according to procedure B. The purified product contains octadecane, wherein the separation has failed.

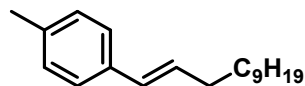

$C_{19}H_{30}$  258.45 g/mol

**TLC**  $R_f = 0.8$  (hexanes)

**$^1H$ -NMR** (300 MHz,  $CDCl_3$ )  $\delta_H$  [ppm] = 7.26 - 7.20 (m, 2H), 7.10 (d,  $J = 8.0$  Hz, 2H), 6.38 - 6.30 (m, 1H), 6.17 (dt,  $J = 15.8, 6.9$  Hz, 1H), 2.32 (s, 3H), 2.19 (q,  $J = 6.8$  Hz, 2H), 1.50 - 1.22 (m, 16H), 0.88 (t,  $J = 6.7$  Hz, 3H).

**$^{13}C$ -NMR** (75 MHz,  $CDCl_3$ )  $\delta_C$  [ppm] = 136.4, 135.2, 130.3, 129.5, 129.2, 125.7, 33.1, 32.0, 29.7, 29.7, 29.6, 29.5, 29.4, 29.3, 22.7, 21.2, 14.2.

**GC-MS** (EI, 70 eV, m/z): 258  $[M]^+$ , 143, 131, 115, 106, 91, 77, 67, 55.

The data correspond to the literature values.<sup>19</sup>

### (E)-1-(4-methoxyphenyl)-dodec-1-ene

Synthesized according to procedure B. The purified product contains octadecane, wherein the separation has failed.

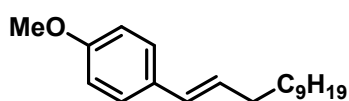

$C_{19}H_{30}O$  274.45 g/mol

**TLC**  $R_f = 0.7$  (hexanes)

**$^1H$ -NMR** (300 MHz,  $CDCl_3$ )  $\delta_H$  [ppm] = 7.34 - 7.21 (m, 2H), 6.89 - 6.76 (m, 2H), 6.40 - 6.24 (m, 1H), 6.08 (dt,  $J = 15.8, 6.8$  Hz, 1H), 3.81 (s, 3H), 2.25 - 2.09 (m, 2H), 1.49 - 1.16 (m, 16H), 0.88 (t,  $J = 6.7$  Hz, 3H).

**<sup>13</sup>C-NMR** (75 MHz, CDCl<sub>3</sub>) δ<sub>C</sub> [ppm] = 158.6, 130.8, 129.1, 129.0, 126.9, 113.9, 55.3, 33.1, 32.0, 29.7, 29.7, 29.7, 29.6, 29.4, 29.3, 22.7, 14.2.

**GC-MS** (EI, 70 eV, m/z): 274 [M]<sup>+</sup>, 159, 147, 134, 121, 103, 91, 78, 67, 55.  
The data correspond to the literature values.<sup>20</sup>

### **(E)-1-(4-chlorophenyl)-dodec-1-ene**

Synthesized according to procedure B.

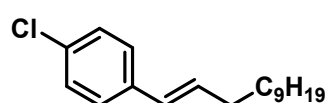

C<sub>18</sub>H<sub>27</sub>Cl 278.86 g/mol

**TLC** R<sub>f</sub> = 0.8 (hexanes)

**<sup>1</sup>H-NMR** (300 MHz, Chloroform-d) δ 7.18 (s, 4H), 6.25 (d, J = 15.9 Hz, 1H), 6.12 (dt, J = 15.8, 6.6 Hz, 1H), 2.12 (q, J = 7.0 Hz, 2H), 1.38 (t, J = 7.2 Hz, 2H), 1.29 – 1.14 (m, 14H), 0.88 – 0.73 (m, 3H).

**<sup>13</sup>C-NMR** (75 MHz, CDCl<sub>3</sub>) δ 136.44, 132.24, 132.02, 128.57, 128.50, 127.09, 33.05, 31.93, 29.64, 29.54, 29.37, 29.31, 29.26, 22.72, 14.15.

**GC-HRMS** (EI, 70 eV m/z): found 278.17889 [M]<sup>+</sup> (calculated 278.17958).

### **(E)-dodec-1-ene-1,3-diylidibenzene**

Synthesized according to procedure B.

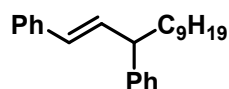

C<sub>24</sub>H<sub>32</sub> 320.52 g/mol

**TLC** R<sub>f</sub> = 0.8 (hexanes)

**<sup>1</sup>H-NMR** (300 MHz, Chloroform-d) δ 7.33 – 7.02 (m, 10H), 6.38 – 6.17 (m, 2H), 3.32 (q, J = 7.2 Hz, 1H), 1.75 (s, 2H), 1.19 (m, 14H), 0.85 – 0.74 (m, 3H).

**<sup>13</sup>C-NMR** (75 MHz, CDCl<sub>3</sub>) δ 144.77, 137.63, 134.51, 129.22, 128.68, 128.47, 128.45, 128.31, 127.64, 126.99, 126.13, 125.74, 49.21, 35.92, 31.90, 29.62, 29.56, 29.33, 27.65, 22.70, 14.14.

**GC-HRMS** (EI, 70 eV, m/z): found 320.2483 [M]<sup>+</sup> (calculated 320.2499).

### dodec-1-en-2-ylbenzene

Synthesized according to procedure B.

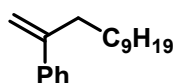

C<sub>18</sub>H<sub>28</sub> 244.42 g/mol

**TLC** R<sub>f</sub> = 0.8 (hexanes)

**<sup>1</sup>H-NMR** (300 MHz, Chloroform-d) δ 7.46 – 7.20 (m, 5H), 5.26 (d, J = 1.6 Hz, 1H), 5.05 (q, J = 1.4 Hz, 1H), 2.49 (td, J = 7.4, 1.3 Hz, 2H), 1.44 (s, 1H), 1.43 – 1.19 (m, 15H), 0.93 – 0.82 (m, 3H).

**<sup>13</sup>C-NMR** (75 MHz, CDCl<sub>3</sub>) δ 148.78, 141.47, 128.21, 127.22, 126.11, 112.00, 35.37, 31.93, 29.63, 29.48, 29.38, 28.28, 22.72, 14.16.

**GC-MS** (EI, 70 eV, m/z): 244 [M]<sup>+</sup>, 143, 131, 118, 103, 91, 77, 77, 55.

The data correspond to the literature values.<sup>21</sup>

### (E)-tridec-2-en-1-ylbenzene

Synthesized according to procedure B.

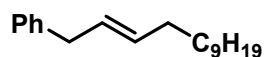

C<sub>19</sub>H<sub>30</sub> 258.45 g/mol

**TLC** R<sub>f</sub> = 0.8 (hexanes)

**<sup>1</sup>H-NMR** (300 MHz, Chloroform-d) δ 7.40 – 7.24 (m, 2H), 7.24 – 7.09 (m, 3H), 5.67 – 5.42 (m, 2H), 3.33 (d, J = 5.3 Hz, 2H), 2.09 – 1.95 (m, 2H), 1.40 – 1.20 (m, 16 H), 0.96 – 0.83 (m, 3H).

**<sup>13</sup>C-NMR** (75 MHz, CDCl<sub>3</sub>) δ 141.16, 132.19, 128.64, 128.48, 128.32, 125.84, 39.09, 32.55, 31.95, 29.66, 29.54, 29.51, 29.38, 29.23, 22.73, 14.17.

**GC-HRMS** (EI, 70 eV, m/z): found 258.2337 [M]<sup>+</sup> (calculated 258.2342).

### **(E)-but-1-en-1-ylbenzene**

Synthesized according to procedure B.

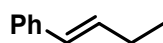

C<sub>10</sub>H<sub>12</sub> 132.21 g/mol

**TLC** R<sub>f</sub> = 0.8 (hexanes)

**<sup>1</sup>H-NMR** (300 MHz, Chloroform-d) δ 7.41 – 7.32 (m, 2H), 7.32 – 7.14 (m, 3H), 6.45 – 6.33 (m, 1H), 6.28 (dt, J = 15.9, 6.1 Hz, 1H), 2.32 – 2.15 (m, 2H), 1.10 (t, J = 7.5 Hz, 3H).

**<sup>13</sup>C-NMR** (75 MHz, CDCl<sub>3</sub>) δ 137.93, 132.66, 128.76, 128.48, 126.76, 125.90, 26.10, 13.68.

**GC-MS** R<sub>t</sub> = 5.72 min  
(EI, 70 eV, m/z): 132 [M]<sup>+</sup>, 117, 104, 91, 77, 63, 51.

The data correspond to the literature values.<sup>22</sup>

### **(E)-(3-cyclohexylprop-1-en-1-yl)benzene.**

Synthesized according to procedure B.

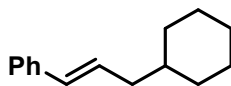

C<sub>15</sub>H<sub>20</sub> 200.33 g/mol

**<sup>1</sup>H-NMR** (300 MHz, Chloroform-d) δ 7.18 (ddt, J = 27.9, 14.1, 7.3 Hz, 5H), 6.28 (d, J = 15.8 Hz, 1H), 6.14 (dt, J = 15.4, 7.1 Hz, 1H), 2.01 (dd, J = 15.6, 8.7 Hz, 2H), 1.63 (q, J = 13.2, 12.3 Hz, 5H), 1.32 (ddd, J = 11.0, 7.3, 3.6 Hz, 1H), 1.15 (dt, J = 20.3, 7.1 Hz, 3H), 1.00 – 0.74 (m, 2H).

**<sup>13</sup>C-NMR** (75 MHz, CDCl<sub>3</sub>) δ 137.94, 130.68, 129.78, 128.46, 126.74, 125.91, 41.08, 38.22, 33.23, 26.59, 26.38.

**GC-MS** (EI, 70 eV, m/z): 200 [M]<sup>+</sup>, 141, 128, 115, 104, 91, 83, 77, 65, 55.

The data correspond to the literature values.<sup>23</sup>

**(E)-1-(9-phenylnon-8-en-1-yl)-1H-indole**

Synthesized according to procedure B.

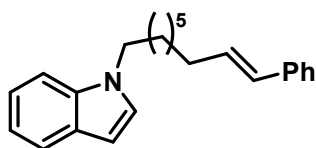

C<sub>23</sub>H<sub>27</sub>N 317.48 g/mol

**TLC** R<sub>f</sub> = 0.3 (hexanes/ethylacetate = 200/1)

**<sup>1</sup>H-NMR** (300 MHz, Chloroform-d) δ 7.64 (d, J = 7.8 Hz, 1H), 7.40 – 7.03 (m, 9H), 6.49 (s, 1H), 6.37 (d, J = 15.9 Hz, 1H), 6.21 (dt, J = 15.8, 6.8 Hz, 1H), 4.19 – 4.01 (m, 2H), 2.26 – 2.04 (m, 2H), 1.86 (q, J = 8.1, 7.0 Hz, 2H), 1.51 – 1.39 (m, 2H), 1.38 – 1.21 (m, 6H).

**<sup>13</sup>C-NMR** (75 MHz, CDCl<sub>3</sub>) δ 137.87, 135.92, 131.02, 129.80, 128.49, 127.81, 126.80, 125.90, 121.28, 120.93, 119.14, 109.38, 100.82, 46.42, 32.98, 30.26, 29.27, 29.15, 29.07, 26.99.

**GC-HRMS** (EI, 70 eV m/z): found 317.21286 [M]<sup>+</sup> (calculated 317.21380).

**(E)-(7-phenoxyhept-1-en-1-yl)benzene**

Synthesized according to procedure B.

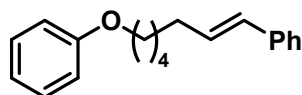

C<sub>19</sub>H<sub>22</sub>O 266.38 g/mol

**TLC** R<sub>f</sub> = 0.4 (hexanes/ethylacetate = 200/1)

**<sup>1</sup>H-NMR** (300 MHz, Chloroform-d) δ 7.40 – 7.27 (m, 6H), 7.27 – 7.11 (m, 1H), 7.07 – 6.84 (m, 3H), 6.46 – 6.33 (m, 1H), 6.23 (dt, J = 15.8,

6.8 Hz, 1H), 3.97 (t,  $J = 6.5$  Hz, 2H), 2.25 (tdd,  $J = 7.0, 5.6, 1.4$  Hz, 2H), 1.90 – 1.72 (m, 2H), 1.65 – 1.44 (m, 4H).

**$^{13}\text{C-NMR}$**  (75 MHz,  $\text{CDCl}_3$ )  $\delta$  159.05, 137.81, 130.79, 129.97, 129.42, 128.49, 126.83, 125.92, 120.48, 114.47, 67.73, 32.97, 29.19, 29.13, 25.68.

**GC-HRMS** (EI, 70 eV,  $m/z$ ): found 266.1661  $[\text{M}]^{+}$  (calculated 266.1665).

### Allylbenzene

Synthesized according to procedure B.

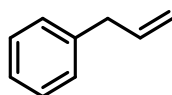

$\text{C}_9\text{H}_{10}$  118.18 g/mol

**$^1\text{H-NMR}$**  (300 MHz, Chloroform- $d$ )  $\delta$  7.30 – 6.96 (m, 5H), 5.89 (m, 1H), 5.09 – 4.89 (m, 2H), 3.31 (d,  $J = 6.6$  Hz, 2H).

**$^{13}\text{C-NMR}$**  (75 MHz,  $\text{CDCl}_3$ )  $\delta$  140.07, 137.48, 128.61, 128.44, 126.08, 115.80, 40.28.

**GC-MS** (EI, 70 eV,  $m/z$ ): 118  $[\text{M}]^+$ , 91, 65.

The data corresponds to the literature values.<sup>24</sup>

### 4-allylanisole

Synthesized according to procedure B.

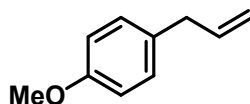

$\text{C}_{10}\text{H}_{12}\text{O}$  148.21 g/mol

**TLC**  $R_f = 0.6$  (hexanes/ethylacetate 20/1)

**$^1\text{H-NMR}$**  (300 MHz,  $\text{CDCl}_3$ )  $\delta_{\text{H}}$  [ppm] = 7.16 - 7.08 (m, 2H), 6.89 - 6.81 (m, 2H), 5.96 (ddt,  $J = 16.8, 10.4, 6.6$  Hz, 1H), 5.12 - 5.06 (m, 1H), 5.04 (d,  $J = 0.7$  Hz, 1H), 3.80 (s, 3H), 3.34 (d,  $J = 6.6$  Hz, 2H).

**<sup>13</sup>C-NMR** (75 MHz, CDCl<sub>3</sub>) δ<sub>C</sub> [ppm] = 158.0, 137.9, 132.1, 129.5, 115.5, 113.8, 55.3, 39.4.

**GC-MS** (EI, 70 eV, m/z): 148 [M]<sup>+</sup>.

The data corresponds to the literature values.<sup>25</sup>

### **(E)-prop-1-ene-1,3-diylidibenzene**

Synthesized according to procedure B.

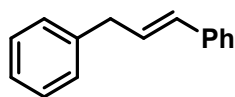

C<sub>15</sub>H<sub>14</sub> 194.28 g/mol

**TLC** R<sub>f</sub> = 0.3 (hexanes)

**<sup>1</sup>H-NMR** (300 MHz, CDCl<sub>3</sub>) δ<sub>H</sub> [ppm] = 7.30 - 7.08 (m, 10H), 6.42 - 6.27 (m, 2H), 3.47 (d, J = 6.4 Hz, 2H).

**<sup>13</sup>C-NMR** (75 MHz, CDCl<sub>3</sub>) δ 140.18, 137.49, 131.09, 129.24, 128.76, 128.51, 127.18, 126.19, 126.14, 39.37.

**GC-MS** (EI, 70 eV, m/z): 194 [M]<sup>+</sup>, 179, 165, 115, 102, 91, 78, 65, 51.

The data corresponds to the literature values.<sup>26</sup>

### **(E)-but-1-ene-1,4-diylidibenzene**

Synthesized according to procedure B.

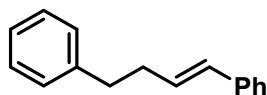

C<sub>16</sub>H<sub>16</sub> 208.30 g/mol

**<sup>1</sup>H-NMR** (300 MHz, Chloroform-d) δ 7.32 (m, 10H), 6.47 (d, J = 16.0 Hz, 1H), 6.32 (dt, J = 15.1, 6.7 Hz, 1H), 2.84 (t, J = 7.8 Hz, 2H), 2.58 (q, J = 7.4 Hz, 2H).



**<sup>13</sup>C-NMR** (75 MHz, CDCl<sub>3</sub>) δ 141.78, 137.74, 130.40, 129.99, 128.50, 128.38, 126.96, 126.02, 125.91, 35.91, 34.91.

**GC-MS** (EI, 70 eV, m/z): 208 [M]<sup>+</sup>, 117, 102, 91, 77, 65, 51.

The data corresponds to the literature values.<sup>26</sup>

## 4 Mechanistic Investigations

### External Functional Group Test / Effect of electrophiles

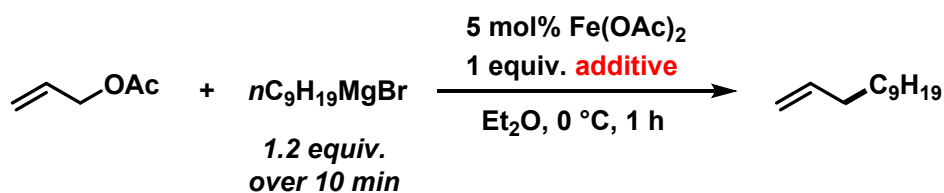

A suspension of Fe(OAc)<sub>2</sub> (0.025 mmol, 4.3 mg) in absolute Et<sub>2</sub>O (2 mL) was cooled to 0 °C under a nitrogen atmosphere in a flame dried reaction tube. After the addition of freshly distilled allyl acetate (0.5 mmol, 54 μL) and additive, a 1.0 M *n*-nonylmagnesium bromide solution (0.6 mmol, 0.6 mL) in Et<sub>2</sub>O was added dropwise over a period of 10 minutes and the mixture was stirred at 0 °C for 1 hour. The reaction mixture was then hydrolyzed with a saturated NH<sub>4</sub>Cl solution and the aqueous phase was extracted with EtOAc. Products were analyzed via GC-MS and GC-FID.

| Entry | Additive                                                   | Additive conversion [%] <sup>a</sup> | Yield [%] <sup>a</sup> |
|-------|------------------------------------------------------------|--------------------------------------|------------------------|
| 1     | -                                                          | -                                    | 77                     |
| 2     | PhCN                                                       | 0                                    | 21                     |
| 3     | <i>n</i> -C <sub>3</sub> H <sub>7</sub> CN                 | 9                                    | 49                     |
| 4     | PhNO <sub>2</sub>                                          | 90                                   | <1                     |
| 5     | EtNO <sub>2</sub>                                          | 87                                   | 8                      |
| 6     | PhNH <sub>2</sub>                                          | 77                                   | 9                      |
| 7     | <i>n</i> -C <sub>6</sub> H <sub>13</sub> NH <sub>2</sub>   | 0                                    | 80                     |
| 8     | PhCHO                                                      | 100                                  | 16                     |
| 9     | <b>PhCO<sub>2</sub>Me</b>                                  | <b>0</b>                             | <b>82</b>              |
| 10    | <i>n</i> -C <sub>3</sub> H <sub>7</sub> CO <sub>2</sub> Me | 4                                    | 72                     |
| 11    | PhOH                                                       | 0                                    | 75 <sup>b</sup>        |
| 12    | <i>n</i> -C <sub>5</sub> H <sub>11</sub> OH                | 6                                    | 79 <sup>b</sup>        |

<sup>a</sup> Yields were determined by quantitative GC-FID vs. internal *n*-pentadecane. <sup>b</sup> 2.2 equiv. *n*-C<sub>9</sub>H<sub>19</sub>MgBr.

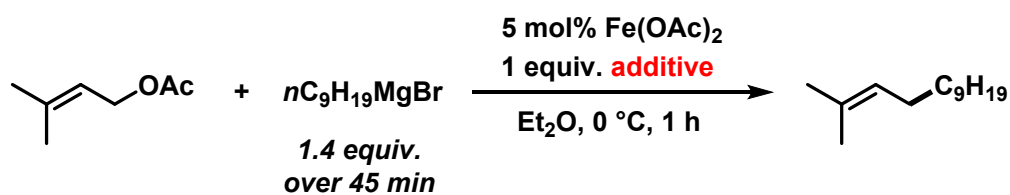

| Entry | Additive             | Yield [%] <sup>a</sup> | Estimated sideproduct <sup>b</sup>                                             |
|-------|----------------------|------------------------|--------------------------------------------------------------------------------|
| 1     | -                    | 27                     | -                                                                              |
| 2     | 1,2- Dichloroethane  | 27                     | -                                                                              |
| 3     | Chlorobenzene        | 24                     | -                                                                              |
| 4     | Chloroform           | 58                     | <br>m/z = 266                                                                  |
| 5     | Air                  | 37                     | C <sub>9</sub> H <sub>19</sub> OH - H <sub>2</sub> O<br>m/z = 126 <sup>c</sup> |
| 6     | PhCO <sub>2</sub> Me | 31                     | <br>- H <sub>2</sub> O<br>m/z = 342                                            |

<sup>a</sup> Yields were determined by quantitative GC-FID vs. internal n-pentadecane. <sup>b</sup> Masses recorded by GC-MS. <sup>c</sup> Retention time at 6.0 min vs. actual Nonenes at 3.7-4.0 min.

## Kinetic Poisoning

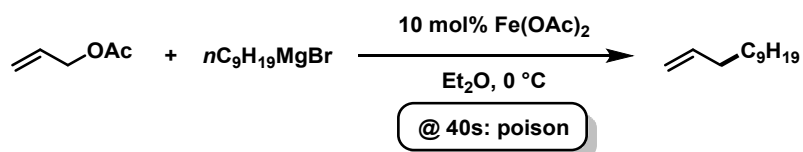

A suspension of  $\text{Fe}(\text{OAc})_2$  (0.05 mmol, 8.7 mg) and *n*-pentadecane (0.18 mmol, 50  $\mu\text{L}$ ) in absolute  $\text{Et}_2\text{O}$  (4 mL) was cooled to 0  $^\circ\text{C}$  under a nitrogen atmosphere in a flame dried schlenk flask. After the addition of freshly distilled allyl acetate (0.50 mmol, 54  $\mu\text{L}$ ), a 1.0 M *n*-nonylmagnesium bromide solution (0.50 mmol, 0.5 mL) in  $\text{Et}_2\text{O}$  was added dropwise over a period of 2 minutes and the mixture was stirred at 0  $^\circ\text{C}$ . Samples of 0.1 mL were taken out during the reaction and hydrolyzed with a saturated  $\text{NH}_4\text{Cl}$  solution. In case of poisoning, the Hg (5.00 mmol, 148  $\mu\text{L}$ ) or Dibenzocyclooctatetrene (dct, 0.25 mmol, 51 mg, dissolved in 0.4 mL absolute  $\text{Et}_2\text{O}$ ) respectively was added after 40 seconds. The yields were determined by quantitative GC-FID vs. *n*-pentadecane as internal standard.

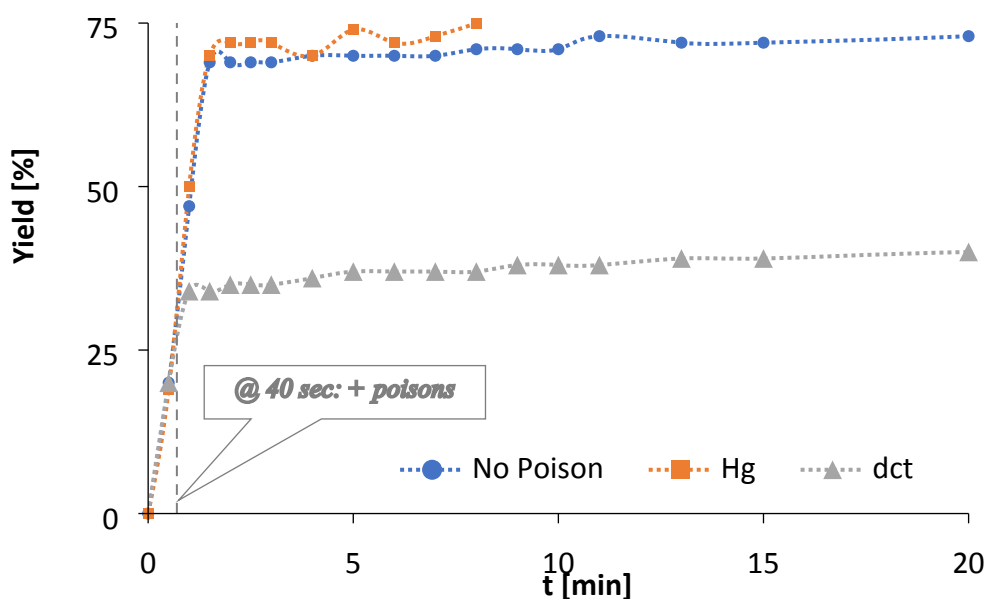

## Filtration Test

A suspension of  $\text{Fe}(\text{OAc})_2$  (0.05 mmol, 8.7 mg) in absolute  $\text{Et}_2\text{O}$  (2 mL) was cooled to 0  $^\circ\text{C}$  under a nitrogen atmosphere in a flame dried schlenk flask. After the addition of

freshly distilled allyl acetate (0.50 mmol, 54  $\mu$ L), a 1.0 M *n*-nonylmagnesium bromide solution (0.50 mmol, 0.5 mL) in Et<sub>2</sub>O was added dropwise over a period of 10 minutes and the mixture was stirred at 0 °C for 1 hour. A sample was taken out (Yield coupling product 78%) and the reaction mixture was filtered.

To the filtrate another 0.5 mmol of allyl acetate and *n*-nonylmagnesium bromide (over 10 min) was added at 0 °C and another reaction cycle was run (Yield 2<sup>nd</sup> cycle filtrate 61%).

The residue of the filtration was washed with absolute Et<sub>2</sub>O (2 x 2 mL) and added to 0.5 mmol allyl acetate in 2 mL absolute Et<sub>2</sub>O. 0.5 mmol of *n*-nonylmagnesium bromide was added at 0 °C over 10 min and another reaction cycle was run (Yield 2<sup>nd</sup> cycle residue 45%).

The yields were determined by quantitative GC-FID vs. *n*-pentadecane as internal standard.

## Radical Clock Experiments

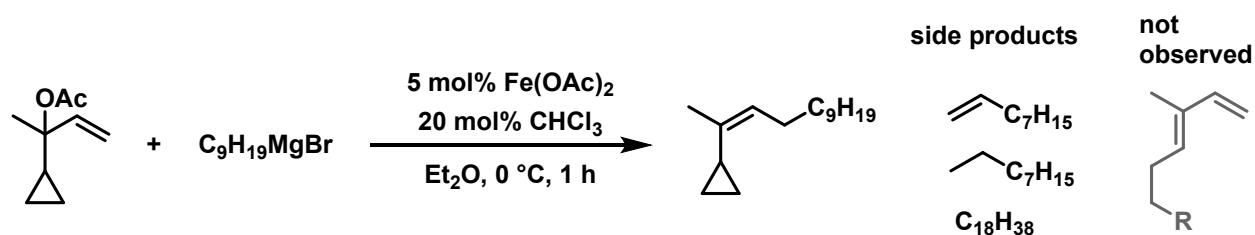

The reaction was carried out as described in Protocol A. The crude NMR showed no ring opening of the cyclopropane as no signal evolved at around 6.X ppm, which would indicate the presence of the diene moiety.<sup>27</sup>

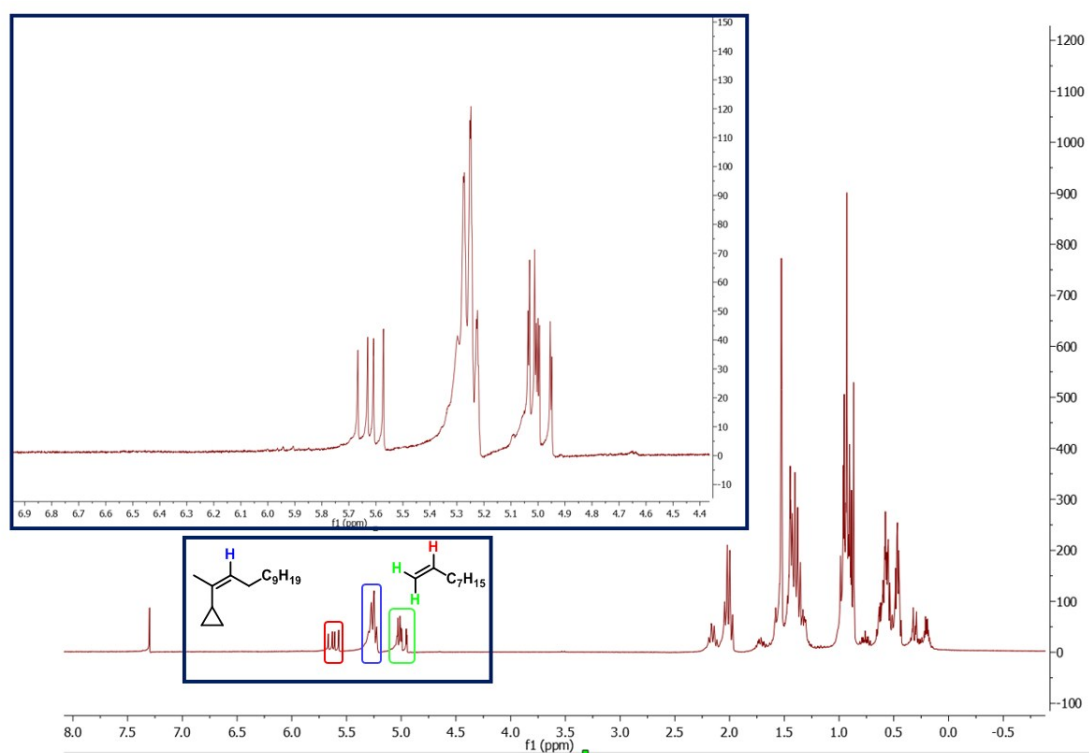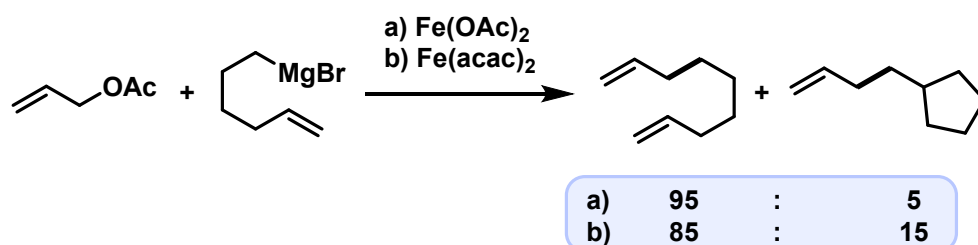

The reaction was carried out as described in a) Protocol A without addition of CHCl<sub>3</sub> and b) Protocol B. The Grignard reagent (2% ring closure) and the reactions were

analyzed by GC-MS and GC-FID. When using cinnamylacetate as the starting material, isolation and NMR analysis of the coupling products was possible, showing roughly 15% of additional ring closure.

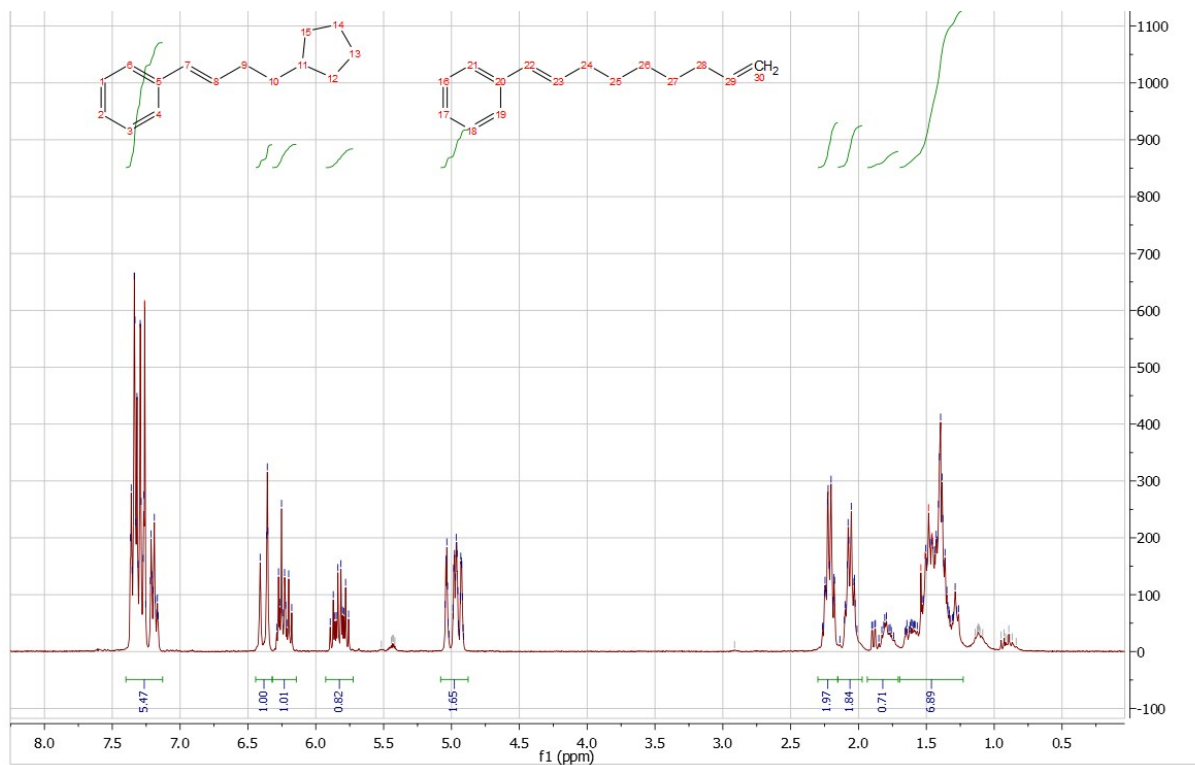

## Stoichiometric Reduction Experiments

For determining the oxidation states of the active catalyst, the following experiments have been done:

A solution of  $\text{Fe}(\text{OAc})_2$  (17.4 mg, 0.1 mmol) in 1 mL diethylether was mixed with **A**) 1 equiv. or **B**) 2 equiv. of  $\text{C}_9\text{H}_{19}\text{MgBr}$  (1 M in diethylether).

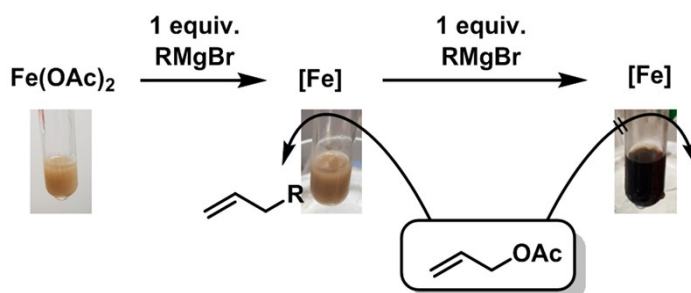

- These suspensions were then added dropwise to separate solutions of allylacetate (0.1 mmol) in 1 mL diethylether. In case of **A** formation of cross coupling product dodecene could be observed (29%), whereas in **B** only traces could be observed.

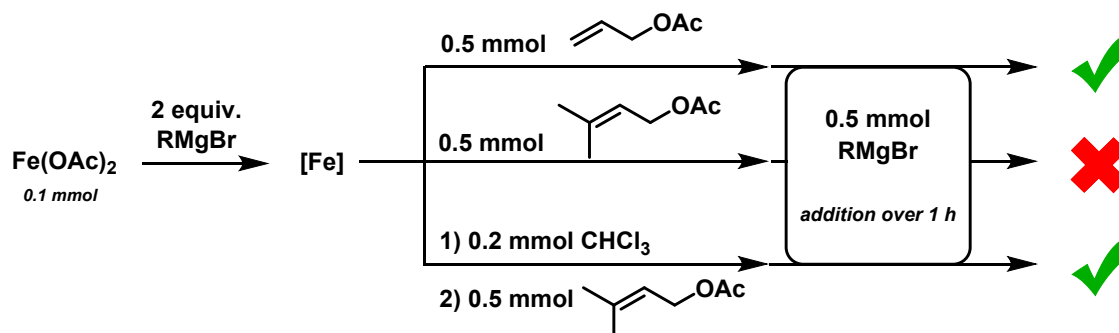

- To a solution of **B** was added **B1**) 0.5 mmol of allylacetate, **B2**) 0.5 mmol prenyl acetate or **B3**) 0.2 mmol chloroform and 0.5 mmol prenylacetate. To these solutions was added 0.5 mmol  $\text{C}_9\text{H}_{19}\text{MgBr}$  over a period of 1 hour. In case of **B1** and **B3** catalytic activity was observed, whereas in **B2** it was not, showing that allylacetate could possibly reoxidize the catalyst, where in the case of prenylacetate  $\text{CHCl}_3$  was necessary as an oxidizing agent.



### Hydrogenation Poisoning studies

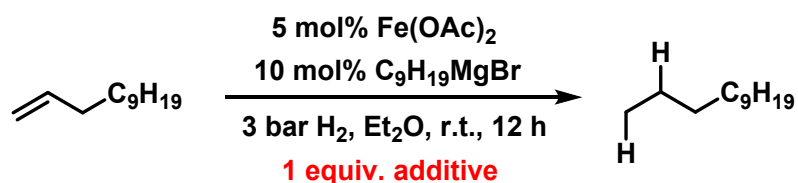

1-Dodecene (0.25 mmol), 5 mol% Fe(OAc)<sub>2</sub> and 1 equiv. of additive were mixed in a flame dried autoclave vial in an argon-filled glovebox. 10 mol% of C<sub>9</sub>H<sub>19</sub>MgBr was added and the mixture was stirred vigorously for 2 min. The rubber septum was penetrated with a cannula and the reaction vial was put into an autoclave, which was set under a pressure of 3 bar of H<sub>2</sub>. The reaction was stirred overnight at r.t. and then quenched with aqueous NH<sub>4</sub>Cl solution. The organic phase was extracted with ethyl acetate, dried over sodium sulfate and filtered over a short layer of silica. The yields were determined by quantitative GC-FID vs. *n*-pentadecane as internal standard.

| Entry | Additive          | Conversion [%] | Yield [%] |
|-------|-------------------|----------------|-----------|
| 1     | -                 | 100            | 77        |
| 2     | MgBr <sub>2</sub> | 19             | <1        |
| 3     | MgCl <sub>2</sub> | 100            | 72        |
| 4     | LiBr              | 3              | <1        |

[a] 25 bar H<sub>2</sub>.

## References

1. G. Rai, C. J. Thomas, W. Leister and D. J. Maloney, *Tetrahedron Lett.*, 2009, **50**(15), 1710.
2. N. Shimojoh, Y. Imura, K. Moriyama and H. Togo, *Tetrahedron*, 2011, **67**(5), 951.
3. W. Lölsberg, S. Ye and H.-G. Schmalz, *Adv. Synth. Catal.*, 2010, **352**(11-12), 2023.
4. O. Geiseler and J. Podlech, *Tetrahedron*, 2012, **68**(36), 7280.
5. D. Francová and G. Kickelbick, *Monatsh. Chem.*, 2009, **140**(4), 413.
6. Watson, Iain D G and A. K. Yudin, *J. Am. Chem. Soc.*, 2005, **127**(49), 17516.
7. S. Magens, M. Ertelt, A. Jatsch and B. Plietker, *Org. Lett.*, 2008, **10**(1), 53.
8. D. Pan, A. Chen, Y. Su, W. Zhou, S. Li, W. Jia, J. Xiao, Q. Liu, L. Zhang and N. Jiao, *Angew. Chem. Int. Ed.*, 2008, **47**(25), 4729.
9. D. D. Rowan, H. P. Lane, J. M. Allen, S. Fielder and M. B. Hunt, *J. Agric. Food Chem.*, 1996, **44**(10), 3276.
10. N. Marion, R. Gealageas and S. P. Nolan, *Org. Lett.*, 2007, **9**(14), 2653.
11. M. Brookhart, B. Grant and A. F. Volpe, *Organometallics*, 1992, **11**(11), 3920.
12. B. E. Love and E. G. Jones, *The Journal of organic chemistry*, 1999, **64**(10), 3755.
13. T. N. Gieshoff, U. Chakraborty, M. Villa and A. Jacobi von Wangelin, *Angew. Chem. Int. Ed.*, 2017, **56**(13), 3585.
14. T. Hatakeyama, N. Nakagawa and M. Nakamura, *Org. Lett.*, 2009, **11**(20), 4496.
15. G. Cahiez, C. Duplais and A. Moyeux, *Org. Lett.*, 2007, **9**(17), 3253.
16. M. Sada, S. Komagawa, M. Uchiyama, M. Kobata, T. Mizuno, K. Utimoto, K. Oshima and S. Matsubara, *J. Am. Chem. Soc.*, 2010, **132**(49), 17452.
17. I. L. Lysenko, K. Kim, H. G. Lee and J. K. Cha, *J. Am. Chem. Soc.*, 2008, **130**(47), 15997.
18. D. M. Hodgson, M. J. Fleming and S. J. Stanway, *J. Am. Chem. Soc.*, 2004, **126**(39), 12250.
19. K. Ishizuka, H. Seike, T. Hatakeyama and M. Nakamura, *J. Am. Chem. Soc.*, 2010, **132**(38), 13117.
20. A. Krasovskiy and B. H. Lipshutz, *Org. Lett.*, 2011, **13**(15), 3818.
21. A. Krasovskiy and B. H. Lipshutz, *Org. Lett.*, 2011, **13**(15), 3822.
22. N. Sakai, T. Moriya and T. Konakahara, *J. Org. Chem.*, 2007, **72**(15), 5920.

23. V. B. Phapale, M. Guisán-Ceinos, E. Buñuel and D. J. Cárdenas, *Chem. Eur. J.*, 2009, **15**(46), 12681.
24. S. K. Pandey, A. E. Greene and J.-F. Poisson, *J. Org. Chem.*, 2007, **72**(20), 7769.
25. D. Seomoon, K. Lee, H. Kim and P. H. Lee, *Chem. Eur. J.*, 2007, **13**(18), 5197.
26. D. Habrant, B. Stengel, S. Meunier and C. Mioskowski, *Chem. Eur. J.*, 2007, **13**(19), 5433.
27. K. K. Wang, C. Liu, Y. G. Gu, F. N. Burnett and P. D. Sattsangi, *J. Org. Chem.*, 1991, **56**(5), 1914.
